# Supplementary material
Source: ML conference proceedings conference paper supplement (https://proceedings.neurips.cc/paper_files/paper/2020/hash/607bc9ebe4abfcd65181bfbef6252830-Abstract.html)
Supplement: Supplementary file [file 607bc9ebe4abfcd65181bfbef6252830-Supplemental.pdf]

---

# Optimal Algorithms for Stochastic Multi-Armed Bandits with Heavy Tailed Rewards

---

Anonymous Author(s)

Affiliation

Address

email

1 In this appendix, we prove Theorem 1, 2, 3, 4 and Corollary 1 in the main paper.

## 2 A Regret Lower Bound for Robust Upper Confidence Bound

3 In this section, we prove Theorem 1 in Section 3, which derives the lower bound of the expected  
4 cumulative regret of robust UCB [4]. First, we recall Assumption 1 in the main paper.

5 **Assumption A.1.** Let  $\{Y_k\}_{k=1}^\infty$  be i.i.d. random variables with the finite  $p$ -th moment for  $p \in (1, 2]$ .  
6 Let  $\nu_p$  be a bound of the  $p$ -th moment and  $y$  be the mean of  $Y_k$ . Assume that, for all  $\delta \in (0, 1)$  and  $n$   
7 number of observations, there exists an estimator  $\hat{Y}_n(\eta, \nu_p, \delta)$  with a parameter  $\eta$  such that

$$\mathbb{P}\left(\hat{Y}_n > y + \nu_p^{1/p} \left(\frac{\eta \ln(1/\delta)}{n}\right)^{1-1/p}\right) \leq \delta, \quad \mathbb{P}\left(y > \hat{Y}_n + \nu_p^{1/p} \left(\frac{\eta \ln(1/\delta)}{n}\right)^{1-1/p}\right) \leq \delta.$$

8 Assumption A.1 provides the confidence bound of the estimator  $\hat{Y}_n$ . Note that  $\hat{Y}_n = \hat{Y}_n(\eta, \nu_p, \delta)$   
9 requires  $\nu_p$  and  $\delta$ . By using this confidence bound, at round  $t$ , robust UCB selects an action based on  
10 the following strategy,

$$a_t := \arg \max_{a \in \mathcal{A}} \left\{ \hat{r}_{t-1,a} + \nu_p^{1/p} (\eta \ln(t^2)/n_{t-1,a})^{1-1/p} \right\} \quad (\text{A.1})$$

11 where  $\hat{r}_{t-1,a}$  is an estimator which satisfies Assumption A.1 with  $\delta = t^{-2}$  and  $n_{t-1,a}$  denotes the  
12 number of times  $a \in \mathcal{A}$  have been selected. Under the strategy (A.1), we prove Theorem 1 in the  
13 main paper.

14 **Theorem A.2.** Assume that truncated mean, median of mean, and Catoni's  $M$  estimator are employed  
15 to estimate the rewards. Then, there exists a  $K$ -armed stochastic bandit problem for which the regret

16 of the robust UCB has the following lower bound, for  $T > \max\left(10, \left[\frac{\nu^{1/(p-1)}}{\eta(K-1)}\right]^2\right)$ ,

$$\mathbb{E}[\mathcal{R}_T] \geq \Omega\left((K \ln(T))^{\frac{p-1}{p}} T^{\frac{1}{p}}\right). \quad (\text{A.2})$$

*Proof.* The proof is done by constructing a counter example. We construct a  $K$ -armed bandit problem  
with deterministic rewards. Let the optimal arm  $a^*$  give the reward of  $\Delta = \nu^{\frac{1}{p}} \left(\frac{\eta(K-1) \ln(T)}{T}\right)^{\frac{p-1}{p}}$

whereas the other arms provide zero rewards. Note that  $\Delta \leq \nu^{\frac{1}{p}} \left(\frac{\eta(K-1)}{T^{\frac{1}{2}}}\right)^{\frac{p-1}{p}} < 1$  and the estimator  
we used satisfies  $\hat{r}_a \leq \Delta \mathbb{1}[a = a^*]$  for all  $a$  since rewards are  $\Delta$  or 0 in this MAB problem. Let  $E_t$   
be the set of events which satisfy

$$\sum_{a \neq a^*} n_{t-1,a} \leq \frac{\nu^{\frac{1}{p-1}} \eta(K-1)}{2 \left( \left(1 + 5^{\frac{p-1}{p}}\right) \Delta \right)^{\frac{p}{p-1}}} \ln(T^2) = \frac{T}{\left(1 + 5^{\frac{p-1}{p}}\right)^{\frac{p}{p-1}}}.$$

17 If  $\mathbb{P}(E_t) \leq 1/2$  for some  $t \in [1, \dots, T]$ , then, the regret bound is computed as follows,

$$\mathbb{E}[\mathcal{R}_T] \geq \frac{1}{2} \mathbb{E}[\mathcal{R}_t | E_t^c] \geq \frac{1}{2} \Delta \mathbb{E} \left[ \sum_{a \neq a^*} n_{t,a} \middle| E_t^c \right] \geq \frac{1}{2} \Delta \mathbb{E} \left[ \sum_{a \neq a^*} n_{t-1,a} \middle| E_t^c \right] \quad (\text{A.3})$$

$$\geq \frac{\Delta}{2} \frac{T}{\left(1 + 5 \frac{p-1}{p}\right)^{\frac{p}{p-1}}} = \frac{\nu^{\frac{1}{p}}}{2 \left(1 + 5 \frac{p-1}{p}\right)^{\frac{p}{p-1}}} (\eta(K-1) \ln(T))^{\frac{p-1}{p}} T^{\frac{1}{p}}. \quad (\text{A.4})$$

Hence, if  $\mathbb{P}(E_t) \leq 1/2$  for some  $t \in [1, \dots, T]$ , then, the lower bound holds. On the contrary, if  $\mathbb{P}(E_t) > 1/2$  for all  $t \in [1, \dots, T]$ , then, the proof is done by showing  $\mathbb{P}(a_t \neq a^*) \geq \frac{1}{2}$  for  $t \geq t_0$  where

$$t_0 := \max \left( 1 + \frac{2T}{5(K-1)} + \frac{2T}{\left(1 + 5 \frac{p-1}{p}\right)^{\frac{p}{p-1}}}, T^{\frac{1}{2}} \right).$$

18 Note that  $T > t_0$  holds since  $T > \frac{4T}{5} + 1 > 1 + \frac{2T}{5(K-1)} + \frac{2T}{\left(1 + 5 \frac{p-1}{p}\right)^{\frac{p}{p-1}}}$  holds for  $T > 10$  and

19  $T > \sqrt{T}$  holds. In other words,  $\{t \in [1, \dots, T] : t \geq t_0\}$  is not empty.

20 Before showing that  $\mathbb{P}(a_t \neq a^*) \geq \frac{1}{2}$  holds, we first check the lower bound. When  $\mathbb{P}(E_t) > 1/2$   
 21 holds for all  $t \in [1, \dots, T]$ , if  $\mathbb{P}(a_t \neq a^*) \geq \frac{1}{2}$  holds for  $t \geq t_0$ , then, the lower bound of the regret  
 22 can be obtained as follows,

$$\mathbb{E}[\mathcal{R}_T] \geq \Delta \sum_{t=t_0}^T \mathbb{P}(a_t \neq a^*) \geq \frac{\Delta(T-t_0)}{2} \quad (\text{A.5})$$

$$= \frac{\Delta}{2} \min \left( \left( 1 - \frac{2}{5(K-1)} - \frac{2}{\left(1 + 5 \frac{p-1}{p}\right)^{\frac{p}{p-1}}} \right) T - 1, T(1 - T^{-\frac{1}{2}}) \right) \quad (\text{A.6})$$

$$\geq \frac{\Delta}{2} \min \left( \left( 1 - \frac{2}{5} - \frac{2}{5} \right) T - 1, T(1 - T^{-\frac{1}{2}}) \right) \quad (\text{A.7})$$

23 where the last inequality holds since  $K-1 > 1$  and  $\left(1 + 5 \frac{p-1}{p}\right)^{\frac{p}{p-1}} > 5$ . Then, by  $T > 10$ ,

$$\frac{\Delta}{2} \min \left( \left( 1 - \frac{2}{5} - \frac{2}{5} \right) T - 1, T(1 - T^{-\frac{1}{2}}) \right) \quad (\text{A.8})$$

$$\geq \frac{\Delta T}{2} \min \left( \frac{1}{5} - T^{-1}, 1 - T^{-\frac{1}{2}} \right) \quad (\text{A.9})$$

$$= \nu^{\frac{1}{p}} (\eta(K-1) \ln(T))^{\frac{p-1}{p}} T^{\frac{1}{p}} \min \left( \frac{1}{5} - T^{-1}, 1 - T^{-\frac{1}{2}} \right) \quad (\text{A.10})$$

$$= \frac{1}{10} \nu^{\frac{1}{p}} (\eta(K-1) \ln(T))^{\frac{p-1}{p}} T^{\frac{1}{p}}. \quad (\text{A.11})$$

24 Note that  $\frac{1}{10} < 1 - \frac{1}{\sqrt{10}}$ . Thus, we obtain  $\mathbb{E}[\mathcal{R}_T] \geq \Omega \left( (K \ln(T))^{\frac{p-1}{p}} T^{\frac{1}{p}} \right)$ , if  $\mathbb{P}(a_t \neq a^*) \geq \frac{1}{2}$   
 25 holds for  $t \geq t_0$ .

26 The remaining part is to prove that  $\mathbb{P}(a_t \neq a^*) \geq \frac{1}{2}$  holds for  $t > t_0$  when  $\mathbb{P}(E_t) \geq 1/2$  for all  
 27  $t > 0$ . We mainly prove that, if  $E_t$  occurs,  $a_t = a^*$  never occurs since the confidence bound cannot  
 28 overcome the estimation error between sub-optimal arms and optimal arm under the condition of  $E_t$ .  
 29 In other words,  $\mathbb{P}(a_t \neq a^* | E_t) = 1$ . If  $\mathbb{P}(a_t \neq a^* | E_t) = 1$  holds, then, we can simply show that

$$\mathbb{P}(a_t \neq a^*) \geq \frac{1}{2} \mathbb{P}(a_t \neq a^* | E_t) = \frac{1}{2}. \quad (\text{A.12})$$

30 Now, we analyze the set of event,  $\{a_t \neq a^*\}$ , as follows,

$$\{a_t \neq a^*\} = \bigcup_{a \neq a^*} \left\{ \hat{r}_{a^*} + \nu^{\frac{1}{p}} \left( \frac{\eta \ln(t^2)}{n_{t-1,a^*}} \right)^{\frac{p-1}{p}} \leq \hat{r}_a + \nu^{\frac{1}{p}} \left( \frac{\eta \ln(t^2)}{n_{t-1,a}} \right)^{\frac{p-1}{p}} \right\} \quad (\text{A.13})$$

$$\supset \bigcup_{a \neq a^*} \left\{ \Delta + \nu^{\frac{1}{p}} \left( \frac{\eta \ln(t^2)}{n_{t-1, a^*}} \right)^{\frac{p-1}{p}} \leq \nu^{\frac{1}{p}} \left( \frac{\eta \ln(t^2)}{n_{t-1, a}} \right)^{\frac{p-1}{p}} \right\} \quad (\text{A.14})$$

$$\because \hat{r}_{a^*} \leq \Delta \text{ and } \hat{r}_{a \neq a^*} = 0 \quad (\text{A.15})$$

$$\supset \bigcup_{a \neq a^*} \left\{ \Delta + \nu^{\frac{1}{p}} \left( \frac{\eta \ln(t^2)}{n_{t-1, a^*}} \right)^{\frac{p-1}{p}} \leq \left(1 + 5^{\frac{p-1}{p}}\right) \Delta \leq \nu^{\frac{1}{p}} \left( \frac{\eta \ln(t^2)}{n_{t-1, a}} \right)^{\frac{p-1}{p}} \right\} \quad (\text{A.16})$$

$$= \left\{ \nu^{\frac{1}{p}} \left( \frac{\eta \ln(t^2)}{n_{t-1, a^*}} \right)^{\frac{p-1}{p}} \leq 5^{\frac{p-1}{p}} \Delta \right\} \cap \bigcup_{a \neq a^*} \left\{ \left(1 + 5^{\frac{p-1}{p}}\right) \Delta \leq \nu^{\frac{1}{p}} \left( \frac{\eta \ln(t^2)}{n_{t-1, a}} \right)^{\frac{p-1}{p}} \right\} \quad (\text{A.17})$$

$$= \left\{ \frac{2\nu^{\frac{1}{p-1}}}{5\Delta^{\frac{p}{p-1}}} \eta \ln(t) \leq n_{t-1, a^*} \right\} \cap \bigcup_{a \neq a^*} \left\{ n_{t-1, a} \leq \frac{2\nu^{\frac{1}{p-1}}}{\left(\left(1 + 5^{\frac{p-1}{p}}\right) \Delta\right)^{\frac{p}{p-1}}} \eta \ln(t) \right\} \quad (\text{A.18})$$

$$\supset \left\{ \frac{2\nu^{\frac{1}{p-1}}}{5\Delta^{\frac{p}{p-1}}} \eta \ln(T) \leq n_{t-1, a^*} \right\} \cap \bigcup_{a \neq a^*} \left\{ n_{t-1, a} \leq \frac{2\nu^{\frac{1}{p-1}}}{\left(\left(1 + 5^{\frac{p-1}{p}}\right) \Delta\right)^{\frac{p}{p-1}}} \eta \ln(t_0) \right\} \quad (\text{A.19})$$

$$\because T > t > t_0 \quad (\text{A.20})$$

$$\supset \left\{ \frac{2T}{5(K-1)} \leq n_{t-1, a^*} \right\} \cap \bigcup_{a \neq a^*} \left\{ n_{t-1, a} \leq \frac{2T}{\left(1 + 5^{\frac{p-1}{p}}\right)^{\frac{p}{p-1}} (K-1)} \frac{\ln(t_0)}{\ln(T)} \right\} \quad (\text{A.21})$$

$$\supset \left\{ \frac{2T}{5(K-1)} \leq n_{t-1, a^*} \right\} \cap \left\{ \sum_{a \neq a^*} n_{t-1, a} \leq \frac{2T}{\left(1 + 5^{\frac{p-1}{p}}\right)^{\frac{p}{p-1}}} \frac{\ln(t_0)}{\ln(T)} \right\}. \quad (\text{A.22})$$

31 Let  $A := \left\{ \frac{2T}{5(K-1)} \leq n_{t-1, a^*} \right\}$  and  $B := \left\{ \sum_{a \neq a^*} n_{t-1, a} \leq \frac{2T}{\left(1 + 5^{\frac{p-1}{p}}\right)^{\frac{p}{p-1}}} \frac{\ln(t_0)}{\ln(T)} \right\}$ . Now, we

32 check that  $A \cap B$  contains  $E_t$  for  $t \geq t_0 := \max \left( 1 + \frac{2T}{5(K-1)} + \frac{2T}{\left(1 + 5^{\frac{p-1}{p}}\right)^{\frac{p}{p-1}}}, T^{\frac{1}{2}} \right)$ .

33 For the set  $A$ , if  $\omega \in E_t$ , then,

$$n_{t-1, a^*} = t - 1 - \sum_{a \neq a^*} n_{t-1, a} \geq t - 1 - \frac{T}{\left(1 + 5^{\frac{p-1}{p}}\right)^{\frac{p}{p-1}}} \because \omega \in E_t \quad (\text{A.23})$$

$$\geq t_0 - 1 - \frac{T}{\left(1 + 5^{\frac{p-1}{p}}\right)^{\frac{p}{p-1}}} \geq \frac{2T}{5(K-1)} + \frac{T}{\left(1 + 5^{\frac{p-1}{p}}\right)^{\frac{p}{p-1}}} \quad (\text{A.24})$$

$$\geq \frac{2T}{5(K-1)}, \quad (\text{A.25})$$

34 which implies  $\omega \in A$ .

For the set  $B$ , we have,

$$\frac{\ln(t_0)}{\ln(T)} \geq \frac{\ln(T^{\frac{1}{2}})}{\ln(T)} = \frac{1}{2}.$$

35 By using this fact, we get

$$\frac{2T}{\left(1 + 5^{\frac{p-1}{p}}\right)^{\frac{p}{p-1}}} \frac{\ln(t_0)}{\ln(T)} \geq \frac{T}{\left(1 + 5^{\frac{p-1}{p}}\right)^{\frac{p}{p-1}}} \geq \sum_{a \neq a^*} n_{t-1,a} \quad \because \omega \in E_t, \quad (\text{A.26})$$

36 which implies  $\omega \in B$ . In summary,  $\omega \in E_t$  implies  $\omega \in A \cap B$ . Consequently, we have,

$$\mathbb{P}(a_t \neq a^*) \geq \frac{1}{2} \mathbb{P}(a_t \neq a^* | E_t) \quad (\text{A.27})$$

$$\geq \frac{1}{2} \mathbb{P}(A \cap B | E_t) = \frac{1}{2}. \quad (\text{A.28})$$

Thus,

$$\mathbb{E}[\mathcal{R}_T] \geq \Omega\left((K \ln(T))^{\frac{p-1}{p}} T^{\frac{1}{p}}\right).$$

37

□

## 38 B Adaptively Perturbed Exploration with A New Robust Estimator

### 39 B.1 Bounds on Tail Probability of A New Robust Estimator

40 Before deriving the bound of tail probability of a new estimator, we first analyze the property of the  
41 influence function  $\psi(x)$ . Then, using the property of  $\psi(x)$ , we show that the tail probability has an  
42 exponential upper bound.

43 **Lemma B.1.** For  $p \in (1, 2]$ , assume that a positive constant  $b_p$  satisfies the following inequality,

$$b_p^{\frac{2}{p}} \left[ 2 \left( \frac{2-p}{p-1} \right)^{1-\frac{2}{p}} + \left( \frac{2-p}{p-1} \right)^{2-\frac{2}{p}} \right] \geq 1.$$

Then, the following inequality holds, for all  $x \in \mathbb{R}$ ,

$$\ln(1 + x + b_p |x|^p) \geq -\ln(1 - x + b_p |x|^p).$$

*Proof.* Let  $f(x) := 1 + x + b_p |x|^p$ . Then, the inequality is represented as  $\ln(f(x)) \geq -\ln(f(-x))$ .  
Before starting the proof, first, we show that  $f(x) > 0$  by checking  $\min_x f(x) > 0$ . For  $x \geq 0$ ,

$$f'(x) = 1 + b_p \cdot p x^{p-1} > 0.$$

which is non-zero for all  $x \geq 0$ . Thus, the minimum of  $f(x)$  will appear at  $x < 0$ . For  $x < 0$ , its  
derivative is

$$f'(x) = 1 - b_p \cdot p (-x)^{p-1}.$$

44 Then,  $f'(x)$  become zero at  $x = -(pb_p)^{-\frac{1}{p-1}}$ . Thus, the minimum of  $f(x)$  is

$$f\left(- (pb_p)^{-\frac{1}{p-1}}\right) = 1 - (pb_p)^{-\frac{1}{p-1}} + b_p (pb_p)^{-\frac{p}{p-1}} = 1 - \left(p^{-\frac{1}{p-1}} - p^{-\frac{p}{p-1}}\right) b_p^{-\frac{1}{p-1}} \quad (\text{B.1})$$

$$\geq 1 - \left(p^{-\frac{1}{p-1}} - p^{-\frac{p}{p-1}}\right) \left[ 2 \left( \frac{2-p}{p-1} \right)^{1-\frac{2}{p}} + \left( \frac{2-p}{p-1} \right)^{2-\frac{2}{p}} \right]^{\frac{p}{2(p-1)}} \quad (\text{B.2})$$

$$\because \left[ 2 \left( \frac{2-p}{p-1} \right)^{1-\frac{2}{p}} + \left( \frac{2-p}{p-1} \right)^{2-\frac{2}{p}} \right]^{\frac{p}{2(p-1)}} \geq b_p^{-\frac{1}{p-1}} \quad (\text{B.3})$$

$$= 1 - p^{-\frac{p}{p-1}} \left[ 2(p-1)(2-p)^{1-\frac{2}{p}} + (2-p)^{2-\frac{2}{p}} \right]^{\frac{p}{2(p-1)}} \quad (\text{B.4})$$

$$= 1 - p^{-\frac{p}{p-1}} [2(p-1) + (2-p)]^{\frac{p}{2(p-1)}} (2-p)^{\frac{p-2}{2(p-1)}} \quad (\text{B.5})$$

$$= 1 - p^{-\frac{p}{2(p-1)}} (2-p)^{\frac{p-2}{2(p-1)}} > 0. \quad (\text{B.6})$$

45 Note that  $\frac{1}{2} \leq p^{-\frac{p}{2(p-1)}} (2-p)^{\frac{p-2}{2(p-1)}} < 1$  holds for  $p \in (1, 2]$ . Since  $f(-x)$  and  $f(x)$  are symmetric  
46 to the  $y$ -axis,  $f(-x)$  is also positive for all  $x \in \mathbb{R}$ .

47 By noticing that  $\ln(f(x)) \geq -\ln(f(-x))$  is equivalent to  $f(x)f(-x) > 1$ , We show that the  
 48 following inequality holds,

$$(1 + x + b_p|x|^p)(1 - x + b_p|x|^p) \geq 1 \quad (\text{B.7})$$

$$b_p^2|x|^{2p} + 2b_p|x|^p + 1 - x^2 \geq 1 \quad (\text{B.8})$$

$$b_p^2|x|^{2p-2} + 2b_p|x|^{p-2} - 1 \geq 0 \quad (\because x^2 \geq 0). \quad (\text{B.9})$$

Let us define  $g(z) := b_p^2 z^{2p-2} + 2b_p z^{p-2}$  for  $z > 0$ . Now, we show that  $g(z) > 1$  holds for  $z > 0$ . First, we analyze the derivative of  $g(z)$  computed as follows,

$$g'(z) = 2b_p z^{p-3} (b_p(p-1)z^p + (p-2)).$$

Since  $b_p > 0$  and  $z^{p-3} > 0$ , the sign of  $g'(z)$  is determined by the term  $(b_p(p-1)z^p + (p-2))$ , which is an increasing function and, hence, has a unique root at  $z_0 := \left(\frac{(2-p)}{(p-1)}\right)^{\frac{1}{p}} b_p^{-\frac{1}{p}}$ . In other words, since  $(b_p(p-1)z^p + (p-2))$  has the unique root at  $z_0$  for  $z > 0$ ,  $g'(z)$  also has a unique root at  $z_0$  which is the minimum point. Finally,

$$g(z_0) - 1 = b_p^{\frac{2}{p}} \left[ 2 \left(\frac{2-p}{p-1}\right)^{1-\frac{2}{p}} + \left(\frac{2-p}{p-1}\right)^{2-\frac{2}{p}} \right] - 1 \geq 0.$$

49 where the last inequality holds by the assumption. Consequently,  $g(z) - 1 \geq g(z_0) - 1 \geq 0$  holds  
 50 and, hence,  $f(x)f(-x) \geq 1$  holds. The lemma is proved.  $\square$

**Corollary B.2.** Let  $b_p := \left[ 2 \left(\frac{2-p}{p-1}\right)^{1-\frac{2}{p}} + \left(\frac{2-p}{p-1}\right)^{2-\frac{2}{p}} \right]^{-\frac{p}{2}}$ . For all  $x \in \mathbb{R}$ , the following inequality holds

$$\ln(1 + x + b_p|x|^p) \geq -\ln(1 - x + b_p|x|^p).$$

*Proof.* The proof is done by directly applying the Lemma B.1 with

$$b_p = \left[ 2 \left(\frac{2-p}{p-1}\right)^{1-\frac{2}{p}} + \left(\frac{2-p}{p-1}\right)^{2-\frac{2}{p}} \right]^{-\frac{p}{2}}.$$

51  $\square$

52 **Theorem B.3.** Let  $\{Y_k\}_{k=1}^{\infty}$  be i.i.d. random variable sampled from a heavy-tailed distribution with  
 53 a finite  $p$ -th moment. Define  $y := \mathbb{E}[Y_k]$  and an estimator as

$$\hat{Y}_n := \frac{c}{n^{1-\frac{1}{p}}} \sum_{k=1}^n \psi\left(\frac{Y_k}{cn^{\frac{1}{p}}}\right) \quad (\text{B.10})$$

54 where  $c > 0$  is a constant, and  $\psi$  is an influence function which is defined by:

$$\psi(x) := \begin{cases} \ln(b_p|x|^p + x + 1) & : x \geq 0 \\ \ln(b_p|x|^p - x + 1)^{-1} & : x < 0. \end{cases}$$

55 where  $b_p := \left[ 2 \left(\frac{2-p}{p-1}\right)^{1-\frac{2}{p}} + \left(\frac{2-p}{p-1}\right)^{2-\frac{2}{p}} \right]^{-\frac{p}{2}}$ . Then, for all  $\delta > 0$ ,

$$\mathbb{P}(\hat{Y}_n - y > \delta) \leq \exp\left(-\frac{n^{1-\frac{1}{p}}}{c} \delta + \frac{b_p \nu_p}{c^p}\right)$$

56 and

$$\mathbb{P}(y - \hat{Y}_n > \delta) \leq \exp\left(-\frac{n^{1-\frac{1}{p}}}{c} \delta + \frac{b_p \nu_p}{c^p}\right)$$

57 where  $\nu_p := \mathbb{E}[|Y_k|^p]$ .

58 *Proof.* From the Markov's inequality,

$$\mathbb{P}\left(\frac{n^{1-\frac{1}{p}}\hat{Y}_n}{c} > \frac{n^{1-\frac{1}{p}}}{c}(y+\delta)\right) \leq \exp\left(-\frac{n^{1-\frac{1}{p}}}{c}(y+\delta)\right) \mathbb{E}\left[\exp\left(\frac{n^{1-\frac{1}{p}}}{c}\hat{Y}_n\right)\right] \quad (\text{B.11})$$

59 Since  $\psi(x) \leq \ln(b_p|x|^p + x + 1)$  holds by its definition, we have

$$\mathbb{E}\left[\exp\left(\frac{n^{1-\frac{1}{p}}}{c}\hat{Y}_n\right)\right] \leq \mathbb{E}\left[\prod_{k=1}^n\left(1 + \frac{Y_k}{cn^{\frac{1}{p}}} + b_p\frac{Y_k^p}{2(cn^{\frac{1}{p}})^p}\right)\right] \quad (\text{B.12})$$

$$= \prod_{k=1}^n \mathbb{E}\left[1 + \frac{Y_k}{cn^{\frac{1}{p}}} + b_p\frac{Y_k^p}{2c^pn}\right] \quad (\text{B.13})$$

$$= \left(1 + \frac{y}{cn^{\frac{1}{p}}} + b_p\frac{v_p}{2c^pn}\right)^n \quad (\text{B.14})$$

$$\leq \exp\left(\frac{n^{1-\frac{1}{p}}}{c}y + b_p\frac{v_p}{2c^p}\right) \quad (\text{B.15})$$

60 Combining (B.11) and (B.15), we have

$$\begin{aligned} \mathbb{P}\left(\hat{Y}_n - y > \delta\right) &\leq \exp\left(-\frac{n^{1-\frac{1}{p}}}{c}(y+\delta)\right) \exp\left(\frac{n^{1-\frac{1}{p}}}{c}y + \frac{b_p v_p}{2c^p}\right) \\ &= \exp\left(-\frac{n^{1-\frac{1}{p}}}{c}\delta + \frac{b_p v_p}{2c^p}\right) \end{aligned}$$

61 The upper bound of  $\mathbb{P}\left(y - \hat{Y}_n > \delta\right)$  can be obtained by the similar way. Hence we obtain the desired  
62 result. The theorem is proved.  $\square$

## 63 C Regret Analysis Scheme for General Perturbation

64 In this section, we prove Theorem 3 and 4 in the main paper under Assumption 2.

### 65 C.1 Regret Upper Bounds

66 To analyze the regret  $\mathcal{R}_T$  in the view of expectation, we borrow the notion of filtration  $\{\mathcal{H}_t : t =$   
67  $1, \dots, T\}$  from [2] and [6] where the filtration  $\mathcal{H}_t$  is defined as the history of plays until time  $t$  as  
68 follows

$$\mathcal{H}_t := \{a_\ell, \mathbf{R}_{a_\ell} : \ell = 1, \dots, t\}$$

69 By definition,  $\mathcal{H}_1 \subset \mathcal{H}_2 \subset \dots \subset \mathcal{H}_{T-1}$  holds. Finally, we separates the event  $\{a_t = a\}$  into three  
70 groups based on the threshold  $x_a := r_a + \Delta_a/3$  and  $y_a := r_{a^*} - \Delta_a/3$ . Finally, for a given reward  
71 estimator  $\hat{r}_{t,a}$ , let us define the following sets which will be used to partition the event  $\{a_t = a\}$ :

$$E_{t,a} := \{a_t = a\}, \quad \hat{E}_{t,a} := \{\hat{r}_{t,a} \leq x_a\}, \quad \tilde{E}_{t,a} := \{\hat{r}_{t-1,a} + \beta_{t-1,a}G_{t,a} \leq y_a\}$$

72 We separate  $E_{t,a}$  into three subsets:

$$E_{t,a} = E_{t,a}^{(1)} \cup E_{t,a}^{(2)} \cup E_{t,a}^{(3)} \quad (\text{C.1})$$

73 where

$$\begin{aligned} E_{t,a}^{(1)} &= E_{t,a} \cap \hat{E}_{t,a}^c \\ E_{t,a}^{(2)} &= E_{t,a} \cap \hat{E}_{t,a} \cap \tilde{E}_{t,a} \\ E_{t,a}^{(3)} &= E_{t,a} \cap \hat{E}_{t,a} \cap \tilde{E}_{t,a}^c \end{aligned}$$

74 In the following sections, we estimate the upper bound of the probability of the event  $E_{t,a}$  based on  
75 the decomposition (C.1).

76 **Lemma C.1.** Assume that the  $p$ -th moment of rewards is bounded by a constant  $\nu_p < \infty$ ,  $\hat{r}_{t,a}$  is a  
 77  $p$ -robust estimator of (B.10) and  $F(x)$  satisfies Assumption 2. Then for any action  $a \in \mathcal{A}$ , it holds

$$\sum_{t=1}^T \mathbb{P} \left( E_{t,a}^{(1)} \right) \leq 1 + \exp \left( \frac{b_p \nu_p}{2c^p} \right) \left( \frac{3c}{\Delta_a} \right)^{\frac{p}{p-1}} \Gamma \left( \frac{2p-1}{p-1} \right).$$

78 *Proof.* Fix arm  $a \in \mathcal{A}$ . Let  $\tau_k$  denotes the smallest round when the arm  $a$  is sampled for the  $k$ -th  
 79 time i.e.  $k = \sum_{t=1}^{\tau_k} \mathbb{I}[E_{t,a}]$ . We let  $\tau_0 := 0$  and  $\tau_k = T$  for  $k > n_a(T)$ . Then it is easy to see that for  
 80  $\tau_k < t \leq \tau_{k+1}$

$$\mathbb{I}[E_{t,a}] = \begin{cases} 1 & : t = \tau_{k+1} \\ 0 & : t \neq \tau_{k+1} \end{cases} \quad (\text{C.2})$$

81 Therefore,

$$\begin{aligned} \sum_{t=1}^T \mathbb{P} \left( E_{t,a}^{(1)} \right) &= \sum_{t=1}^T \mathbb{E} \left[ \mathbb{I}[E_{t,a}^{(1)}] \right] = \sum_{k=0}^{T-1} \mathbb{E} \left[ \sum_{t=1+\tau_k}^{\tau_{k+1}} \mathbb{I}[E_{t,a}^{(1)}] \right] \\ &= \mathbb{E} \left[ \sum_{t=1}^{\tau_1} \mathbb{I} \left( E_{t,a} \cap \hat{E}_{t,a}^c \right) \right] + \sum_{k=1}^{T-1} \mathbb{E} \left[ \sum_{t=1+\tau_k}^{\tau_{k+1}} \mathbb{I}[E_{t,a} \cap \hat{E}_{t,a}^c] \right] \\ &\leq 1 + \sum_{k=1}^{T-1} \mathbb{P} \left( \hat{E}_{\tau_{k+1},a}^c \right) \end{aligned}$$

82 where the last inequality holds by (C.2). Also, by the definition of  $\hat{E}_{t,a}$  and Theorem B.3,

$$\begin{aligned} \sum_{k=1}^{T-1} \mathbb{P} \left( \hat{E}_{\tau_{k+1},a}^c \right) &\leq \sum_{k=1}^{T-1} \exp \left( -\frac{\Delta_a k^{1-\frac{1}{p}}}{3c} + \frac{b_p \nu_p}{2c^p} \right) \leq \exp \left( \frac{b_p \nu_p}{2c^p} \right) \int_0^\infty \exp \left( -\frac{\Delta_a x^{1-\frac{1}{p}}}{3c} \right) dx \\ &\leq \exp \left( \frac{b_p \nu_p}{2c^p} \right) \left( \frac{3c}{\Delta_a} \right)^{\frac{p}{p-1}} \frac{p}{p-1} \int_0^\infty \exp(-t) t^{\frac{1}{p-1}} dt \quad \because t = \frac{\Delta_a x^{1-\frac{1}{p}}}{3c} \\ &= \exp \left( \frac{b_p \nu_p}{2c^p} \right) \left( \frac{3c}{\Delta_a} \right)^{\frac{p}{p-1}} \frac{p}{p-1} \Gamma \left( \frac{p}{p-1} \right) \\ &= \exp \left( \frac{b_p \nu_p}{2c^p} \right) \left( \frac{3c}{\Delta_a} \right)^{\frac{p}{p-1}} \Gamma \left( \frac{2p-1}{p-1} \right). \end{aligned}$$

83 where the last equality holds by  $\Gamma(x+1) = x\Gamma(x)$ . The lemma is proved.  $\square$

Next we estimate  $E_{t,a}^{(2)}$ . From now on, we let  $\rho$  stand for the following ratio

$$\rho(g) := \frac{F(g)}{1-F(g)} = \frac{\mathbb{P}(G < g)}{\mathbb{P}(G \geq g)}$$

84 where  $F$  is a cumulative density function of perturbation  $G$ .

85 **Lemma C.2.** Assume that the  $p$ -th moment of rewards is bounded by a constant  $\nu_p < \infty$ ,  $\hat{r}_{t,a}$  is a  
 86  $p$ -robust estimator of (B.10) and  $F(x)$  satisfies Assumption 2. For any action  $a \in \mathcal{A}$ , it holds

$$\begin{aligned} \sum_{t=1}^T \mathbb{P} \left( E_{t,a}^{(2)} \right) &\leq \exp \left( \frac{b_p \nu_p}{2c^p} \right) \left\{ C_1 + \frac{F(0)}{1-F(0)} + 2^{\frac{2p-1}{p-1}} \right\} \Gamma \left( \frac{2p-1}{p-1} \right) \left( \frac{3c}{\Delta_a} \right)^{\frac{p}{p-1}} \\ &\quad + 2 \left( \frac{6c}{\Delta_a} \right)^{\frac{p}{p-1}} \left\{ -F^{-1} \left( \frac{1}{T} \left( \frac{c}{\Delta_a} \right)^{\frac{p}{p-1}} \right) \right\}_+^{\frac{p}{p-1}} + 2 \left( \frac{c}{\Delta_a} \right)^{\frac{p}{p-1}} \end{aligned}$$

87 *Proof.* If  $a = a^*$ , then  $\Delta_a = 0$  so the desired result trivially holds. Therefore, we take  $a \in \mathcal{A} \setminus \{a^*\}$ .  
 88 For the convenience of the notation, we write  $\tilde{r}_{t,a} := \hat{r}_{t-1,a} + \beta_{t-1,a} G_{t,a}$ . Due to the decision rule  
 89 of the perturbation method,  $a_t = a$  implies  $\tilde{r}_{t,a'} \leq \tilde{r}_{t,a}$  for  $a' \in \mathcal{A}$ . Therefore, it holds

$$E_{t,a} \cap \tilde{E}_{t,a} \subset \bigcap_{a' \in \mathcal{A}} \{ \tilde{r}_{t,a'} \leq y_a \} = \{ \tilde{r}_{t,a^*} \leq y_a \} \cap \{ \tilde{r}_{t,a'} \leq y_a, \forall a' \neq a^* \}. \quad (\text{C.3})$$

90 This fact implies

$$\mathbb{P}\left(E_{t,a} \cap \tilde{E}_{t,a} | \mathcal{H}_{t-1}\right) \leq \mathbb{P}\left(\bigcap_{a' \in \mathcal{A}} \{\tilde{r}_{t,a'} \leq y_a\} | \mathcal{H}_{t-1}\right) \quad (\text{C.4})$$

91 Note that events  $\{\tilde{r}_{t,a^*} \leq y_a\}$  and  $\{\tilde{r}_{t,a'} \leq y_a, \forall a' \neq a^*\}$  are independent if  $\mathcal{H}_{t-1}$  is given. From  
92 this fact, (C.4) is equivalent to

$$\begin{aligned} \mathbb{P}\left(\bigcap_{a' \in \mathcal{A}} \{\tilde{r}_{t,a'} \leq y_a\} | \mathcal{H}_{t-1}\right) &= \mathbb{P}(\tilde{r}_{t,a^*} \leq y_a | \mathcal{H}_{t-1}) \mathbb{P}(\tilde{r}_{t,a'} \leq y_a, \forall a' \neq a^* | \mathcal{H}_{t-1}) \\ &= \frac{\mathbb{P}(\tilde{r}_{t,a^*} \leq y_a | \mathcal{H}_{t-1})}{\mathbb{P}(\tilde{r}_{t,a^*} > y_a | \mathcal{H}_{t-1})} \mathbb{P}(\{\tilde{r}_{t,a^*} > y_a\} \cap \{\tilde{r}_{t,a'} \leq y_a, \forall a' \neq a^*\} | \mathcal{H}_{t-1}) \end{aligned}$$

93 Since  $\hat{r}_{t-1,a^*}, \beta_{t-1,a^*}$  are already determined under the condition  $\mathcal{H}_{t-1}$ , we get

$$\mathbb{P}(\tilde{r}_{t,a^*} \leq y_a | \mathcal{H}_{t-1}) = F\left(\frac{r_{a^*} - \hat{r}_{t-1,a^*} - \frac{\Delta_a}{3}}{\beta_{t-1,a^*}}\right)$$

94 Similarly to (C.3), we can observe that

$$\{\tilde{r}_{t,a^*} > y_a\} \cap \{\tilde{r}_{t,a'} \leq y_a, \forall a' \neq a^*\} \subset E_{t,a^*} \cap \tilde{E}_{t,a} \quad (\text{C.5})$$

95 and this implies

$$\mathbb{P}(\{\tilde{r}_{t,a^*} > y_a\} \cap \{\tilde{r}_{t,a'} \leq y_a, \forall a' \neq a^*\} | \mathcal{H}_{t-1}) \leq \mathbb{P}(E_{t,a^*} \cap \tilde{E}_{t,a} | \mathcal{H}_{t-1}) \quad (\text{C.6})$$

96 Therefore,

$$\mathbb{P}(E_{t,a} \cap \tilde{E}_{t,a} | \mathcal{H}_{t-1}) \leq \frac{Q_{t,a^*}}{1 - Q_{t,a^*}} \mathbb{P}(E_{t,a^*} \cap \tilde{E}_{t,a} | \mathcal{H}_{t-1}), \quad (\text{C.7})$$

97 where  $Q_{t,a^*} := F\left(\frac{r_{a^*} - \hat{r}_{t-1,a^*} - \frac{\Delta_a}{3}}{\beta_{t-1,a^*}}\right)$ . By taking an expectation on both sides, we have,

$$\mathbb{P}(E_{t,a}^{(2)}) = \mathbb{P}(E_{t,a} \cap \hat{E}_{t,a} \cap \tilde{E}_{t,a}) \leq \mathbb{E}\left[\frac{Q_{t,a^*}}{1 - Q_{t,a^*}} \mathbb{I}[E_{t,a^*} \cap \hat{E}_{t,a} \cap \tilde{E}_{t,a}]\right]. \quad (\text{C.8})$$

98 Now, we set  $\tau_k$  to denote the smallest round when the optimal arm  $a^*$  is sampled for the  $k$ -th time.  
99 Then, the summation of the right-hand side of C.8 over  $t = 1, \dots, T$  is bounded as follows,

$$\begin{aligned} \sum_{t=1}^T \mathbb{E}\left[\frac{Q_{t,a^*}}{1 - Q_{t,a^*}} \mathbb{I}[E_{t,a^*} \cap \hat{E}_{t,a} \cap \tilde{E}_{t,a}]\right] &= \sum_{k=0}^{T-1} \mathbb{E}\left[\sum_{t=\tau_k+1}^{\tau_{k+1}} \frac{Q_{t,a^*}}{1 - Q_{t,a^*}} \mathbb{I}[E_{t,a^*} \cap \hat{E}_{t,a} \cap \tilde{E}_{t,a}]\right] \\ &= \sum_{k=0}^{T-1} \mathbb{E}\left[\frac{Q_{\tau_{k+1},a^*}}{1 - Q_{\tau_{k+1},a^*}} \mathbb{I}[\hat{E}_{\tau_{k+1},a} \cap \tilde{E}_{\tau_{k+1},a}]\right] \\ &\leq \sum_{k=1}^T \mathbb{E}\left[\frac{Q_{\tau_k,a^*}}{1 - Q_{\tau_k,a^*}}\right]. \end{aligned}$$

100 We first compute the upper bound of the conditional expectation  $\mathbb{E}\left[\frac{Q_{\tau_k,a^*}}{1 - Q_{\tau_k,a^*}} | \mathcal{H}_{\tau_k}\right]$ . From the  
101 definition of  $\tau_k$ , we have  $n_{\tau_k,a} = k$  and  $\beta_{\tau_k,a} = \frac{c}{k^{1-\frac{1}{p}}}$ . By using this fact, we get,

$$\begin{aligned} \mathbb{E}\left[\frac{Q_{\tau_k,a^*}}{1 - Q_{\tau_k,a^*}} | \mathcal{H}_{\tau_k}\right] &= \mathbb{E}\left[\rho\left(\frac{k^{1-\frac{1}{p}}}{c} \left\{r_{a^*} - \hat{r}_{\tau_k,a^*} - \frac{\Delta_a}{3}\right\}\right) | \mathcal{H}_{\tau_k}\right] \\ &= \int_{\mathbb{R}} \rho\left(\frac{k^{1-\frac{1}{p}}}{c} \left\{r_{a^*} - x - \frac{\Delta_a}{3}\right\}\right) \mathbb{P}(\hat{r} \in dx) \quad (\text{C.9}) \end{aligned}$$

102 We decompose  $\mathbb{R} = I_1 \cup I_2 \cup I_3$  into three intervals where  $I_1 := \{x \leq r_{a^*} - \frac{\Delta_a}{3}\}$ ,  $I_2 := \{r_{a^*} - \frac{\Delta_a}{3} <$   
103  $x \leq r_{a^*} - \frac{\Delta_a}{6}\}$ , and  $I_3 := \{r_{a^*} - \frac{\Delta_a}{6} < x\}$ . We derive the upper bound of (C.9) on the each interval.



104 By using the change of variable formula,

$$\begin{aligned}
& \int_{I_1} \rho \left( \frac{k^{1-\frac{1}{p}}}{c} \left\{ r_{a^*} - x - \frac{\Delta_a}{3} \right\} \right) \mathbb{P}(\hat{r} \in dx) \\
&= \int_{-\infty}^{r_{a^*} - \frac{\Delta_a}{3}} \rho \left( \frac{k^{1-\frac{1}{p}}}{c} \left\{ r_{a^*} - x - \frac{\Delta_a}{3} \right\} \right) f_{\hat{r}}(x) dx \\
&= \frac{c}{k^{1-\frac{1}{p}}} \int_0^\infty \rho(g) f_{\hat{r}} \left( r_{a^*} - \frac{c}{k^{1-\frac{1}{p}}} g - \frac{\Delta_a}{3} \right) dg
\end{aligned}$$

105 where  $f_{\hat{r}}$  is the density function of the measure  $\mathbb{P}(\hat{r} \in dx)$ . Note that the following equality holds by  
106 the fundamental theorem of calculus

$$\rho(g) = \frac{F(g)}{1-F(g)} = \int_0^g \frac{h(u)}{1-F(u)} du + \frac{F(0)}{1-F(0)}$$

107 Therefore,

$$\begin{aligned}
& \frac{c}{k^{1-\frac{1}{p}}} \int_0^\infty \frac{F(g)}{1-F(g)} f_{\hat{r}} \left( r_{a^*} - \frac{c}{k^{1-\frac{1}{p}}} g - \frac{\Delta_a}{3} \right) dg \\
&= \frac{c}{k^{1-\frac{1}{p}}} \int_0^\infty \left( \int_0^g \frac{h(u)}{1-F(u)} du + \frac{F(0)}{1-F(0)} \right) f_{\hat{r}} \left( r_{a^*} - \frac{c}{k^{1-\frac{1}{p}}} g - \frac{\Delta_a}{3} \right) dg \\
&= \frac{F(0)}{1-F(0)} \mathbb{P} \left( \frac{\Delta_a}{3} \leq r_{a^*} - \hat{r}_{\tau_k, a^*} \right) \\
&\quad + \frac{c}{k^{1-\frac{1}{p}}} \int_0^\infty \left( \int_0^g \frac{h(u)}{1-F(u)} du \right) f_{\hat{r}} \left( r_{a^*} - \frac{c}{k^{1-\frac{1}{p}}} g - \frac{\Delta_a}{3} \right) dg. \tag{C.10}
\end{aligned}$$

108 From the tail bound of the proposed estimator, we have,

$$\mathbb{P} \left( \frac{\Delta_a}{3} \leq r_{a^*} - \hat{r}_{\tau_k, a^*} \right) \leq \exp \left( -\frac{\Delta_a k^{1-\frac{1}{p}}}{3c} + \frac{b_p \nu_p}{2c^p} \right) \tag{C.11}$$

109 Hence we can get the upper bound of the first term in (C.10). Also, by Fubini-Tonelli theorem, we  
110 can transform the second term of (C.10) as follows

$$\begin{aligned}
& \frac{c}{k^{1-\frac{1}{p}}} \int_0^\infty \left( \int_0^g \frac{h(u)}{1-F(u)} du \right) f_{\hat{r}} \left( r_{a^*} - \frac{c}{k^{1-\frac{1}{p}}} g - \frac{\Delta_a}{3} \right) dg \\
&= \int_0^\infty \left( \int_u^\infty f_{\hat{r}} \left( r_{a^*} - \frac{c}{k^{1-\frac{1}{p}}} g - \frac{\Delta_a}{3} \right) \frac{c}{k^{1-\frac{1}{p}}} dg \right) \frac{h(u)}{1-F(u)} du \\
&= \int_0^\infty \left( \int_{-\infty}^{r_{a^*} - \frac{c}{k^{1-\frac{1}{p}}} u - \frac{\Delta_a}{3}} f_{\hat{r}}(g) dg \right) \frac{h(u)}{1-F(u)} du \\
&= \int_0^\infty \mathbb{P} \left( r_{a^*} - \hat{r}_{\tau_k, a^*} \geq \frac{c}{k^{1-\frac{1}{p}}} u + \frac{\Delta_a}{3} \right) \frac{h(u)}{1-F(u)} du \tag{C.12}
\end{aligned}$$

111 Similar to (C.11), we have

$$\mathbb{P} \left( r_{a^*} - \hat{r}_{\tau_k, a^*} \geq \frac{c}{k^{1-\frac{1}{p}}} u + \frac{\Delta_a}{3} \right) \leq \exp \left( -u - \frac{\Delta_a k^{1-\frac{1}{p}}}{3c} + \frac{b_p \nu_p}{2c^p} \right)$$

112 Thus, we obtain the upper bound of (C.12) as follows

$$\begin{aligned}
& \int_0^\infty \mathbb{P} \left( r_{a^*} - \hat{r}_{\tau_k, a^*} \geq \frac{c}{k^{1-\frac{1}{p}}} u + \frac{\Delta_a}{3} \right) \frac{h(u)}{1-F(u)} du \\
&\leq \int_0^\infty \exp \left( -u - \frac{\Delta_a k^{1-\frac{1}{p}}}{3c} + \frac{b_p \nu_p}{2c^p} \right) \frac{h(u)}{1-F(u)} du \\
&\leq \exp \left( -\frac{\Delta_a k^{1-\frac{1}{p}}}{3c} + \frac{b_p \nu_p}{2c^p} \right) \int_0^\infty \frac{\exp(-u) h(u)}{1-F(u)} du \\
&\leq C \exp \left( -\frac{\Delta_a k^{1-\frac{1}{p}}}{3c} + \frac{b_p \nu_p}{2c^p} \right),
\end{aligned}$$

113 where the last inequality holds due to the assumption on  $F(x)$ . Therefore,

$$\int_{I_1} \rho \left( \frac{k^{1-\frac{1}{p}}}{c} \left\{ r_{a^*} - x - \frac{\Delta_a}{3} \right\} \right) \mathbb{P}(\hat{r} \in dx) \leq C \exp \left( -\frac{\Delta_a k^{1-\frac{1}{p}}}{3c} + \frac{b_p \nu_p}{2c^p} \right) \quad (\text{C.13})$$

$$+ \frac{F(0)}{1-F(0)} \exp \left( -\frac{\Delta_a k^{1-\frac{1}{p}}}{3c} + \frac{b_p \nu_p}{2c^p} \right) \quad (\text{C.14})$$

114 Now we derive the upper bound of the second interval  $I_2 = \{r_{a^*} - \frac{\Delta_a}{3} < x \leq r_{a^*} - \frac{\Delta_a}{6}\}$ . Since  
115  $F(0) \leq 1/2$ , it is easy to see that

$$\rho \left( \frac{k^{1-\frac{1}{p}}}{c} \left\{ r_{a^*} - x - \frac{\Delta_a}{3} \right\} \right) \leq 2F \left( \frac{k^{1-\frac{1}{p}}}{c} \left\{ r_{a^*} - x - \frac{\Delta_a}{3} \right\} \right) \quad (\text{C.15})$$

116 for  $x \in I_2 \cup I_3$ . Hence, for  $x \in I_2$ ,

$$\begin{aligned} & \int_{I_2} \rho \left( \frac{k^{1-\frac{1}{p}}}{c} \left\{ r_{a^*} - x - \frac{\Delta_a}{3} \right\} \right) \mathbb{P}(\hat{r} \in dx) \\ & \leq \int_{r_{a^*} - \frac{\Delta_a}{3}}^{r_{a^*} - \frac{\Delta_a}{6}} 2F \left( \frac{k^{1-\frac{1}{p}}}{c} \left\{ r_{a^*} - x - \frac{\Delta_a}{3} \right\} \right) \mathbb{P}(\hat{r} \in dx) \\ & \leq 2\mathbb{P} \left( \frac{\Delta_a}{6} \leq r_{a^*} - \hat{r}_{\tau_k, a^*} \right). \end{aligned}$$

117 Similar to (C.11), we have

$$2\mathbb{P} \left( \frac{\Delta_a}{6} \leq r_{a^*} - \hat{r}_{\tau_k, a^*} \right) \leq 2 \exp \left( -\frac{\Delta_a k^{1-\frac{1}{p}}}{6c} + \frac{b_p \nu_p}{2c^p} \right). \quad (\text{C.16})$$

118 Hence, we get the upper bound of the integral on  $I_2$  as follows,

$$\sum_{k=1}^T 2 \exp \left( -\frac{\Delta_a k^{1-\frac{1}{p}}}{6c} + \frac{b_p \nu_p}{2c^p} \right) \leq 2 \exp \left( \frac{b_p \nu_p}{2c^p} \right) \Gamma \left( \frac{2p-1}{p-1} \right).$$

119 Finally, due to (C.15) again,

$$\begin{aligned} & \int_{I_3} \rho \left( \frac{k^{1-\frac{1}{p}}}{c} \left\{ r_{a^*} - x - \frac{\Delta_a}{3} \right\} \right) \mathbb{P}(\hat{r} \in dx) \\ & \leq 2 \int_{r_{a^*} - \frac{\Delta_a}{6}}^{\infty} F \left( \frac{k^{1-\frac{1}{p}}}{c} \left\{ r_{a^*} - x - \frac{\Delta_a}{3} \right\} \right) \mathbb{P}(\hat{r} \in dx) \leq 2F \left( -\frac{\Delta_a k^{1-\frac{1}{p}}}{6c} \right). \end{aligned} \quad (\text{C.17})$$

120 By combining (C.14), (C.16), and (C.17),

$$\begin{aligned} \sum_{k=1}^T \mathbb{E} \left[ \frac{Q_{\tau_k, a^*}}{1 - Q_{\tau_k, a^*}} \middle| \mathcal{H}_{\tau_k} \right] & \leq \sum_{k=1}^T \left\{ C \exp \left( -\frac{\Delta_a k^{1-\frac{1}{p}}}{3c} + \frac{b_p \nu_p}{2c^p} \right) \right. \\ & \quad \left. + \frac{F(0)}{1-F(0)} \exp \left( -\frac{\Delta_a k^{1-\frac{1}{p}}}{3c} + \frac{b_p \nu_p}{2c^p} \right) \right\} \\ & \quad + \sum_{k=1}^T 2 \exp \left( -\frac{\Delta_a k^{1-\frac{1}{p}}}{6c} + \frac{b_p \nu_p}{2c^p} \right) + \sum_{k=1}^T 2F \left( -\frac{k^{1-\frac{1}{p}} \Delta_a}{6c} \right) \\ & \leq \exp \left( \frac{b_p \nu_p}{2c^p} \right) \left\{ C + \frac{F(0)}{1-F(0)} \right\} \Gamma \left( \frac{2p-1}{p-1} \right) \left( \frac{3c}{\Delta_a} \right)^{\frac{p}{p-1}} \\ & \quad + 2 \exp \left( \frac{b_p \nu_p}{2c^p} \right) \Gamma \left( \frac{2p-1}{p-1} \right) \left( \frac{6c}{\Delta_a} \right)^{\frac{p}{p-1}} + \sum_{k=1}^T 2F \left( -\frac{k^{1-\frac{1}{p}} \Delta_a}{6c} \right) \end{aligned}$$

$$\leq \exp\left(\frac{b_p \nu_p}{2c^p}\right) \left\{ C + \frac{F(0)}{1-F(0)} + 2^{\frac{2p-1}{p-1}} \right\} \Gamma\left(\frac{2p-1}{p-1}\right) \left(\frac{3c}{\Delta_a}\right)^{\frac{p}{p-1}} \\ + \sum_{k=1}^T 2F\left(-\frac{k^{1-\frac{1}{p}}\Delta_a}{6c}\right).$$

The remaining part is to derive the upper bound of the last term. For  $T > 2\left(\frac{c}{\Delta_a}\right)^{\frac{p}{p-1}}$ , let  $\ell_-$  be the maximal time such that

$$F\left(-\frac{\ell_-^{1-\frac{1}{p}}\Delta_a}{6c}\right) \geq \frac{1}{T} \left(\frac{c}{\Delta_a}\right)^{\frac{p}{p-1}}.$$

Then, we have  $\ell_-$  as follows,

$$\ell_- = \left(\frac{6c}{\Delta_a}\right)^{\frac{p}{p-1}} \left\{ -F^{-1}\left(\frac{1}{T} \left(\frac{c}{\Delta_a}\right)^{\frac{p}{p-1}}\right) \right\}^{\frac{p}{p-1}}.$$

For  $k > \ell_-$ , the following inequality holds,

$$F\left(-\frac{\ell_-^{1-\frac{1}{p}}\Delta_a}{6c}\right) < \frac{1}{T} \left(\frac{c}{\Delta_a}\right)^{\frac{p}{p-1}}.$$

121 Note that  $\frac{1}{T} \left(\frac{c}{\Delta_a}\right)^{\frac{p}{p-1}} \leq \frac{1}{2}$  for  $T > \left(\frac{c}{\Delta_a}\right)^{\frac{p}{p-1}}$  and  $F^{-1}\left(\frac{1}{2T} \left(\frac{c}{\Delta_a}\right)^{\frac{p}{p-1}}\right) < 0$  from the assumption

122  $F(0) < \frac{1}{2}$ .

123 Therefore,

$$\sum_{k=1}^T 2F\left(-\frac{k^{1-\frac{1}{p}}\Delta_a}{6c}\right) \leq 2\ell_- + \sum_{k=\ell_-+1}^T 2F\left(-\frac{k^{1-\frac{1}{p}}\Delta_a}{6c}\right) \\ \leq 2\ell_- + \sum_{k=\ell_-+1}^T \frac{2}{T} \left(\frac{c}{\Delta_a}\right)^{\frac{p}{p-1}} \\ \leq 2 \left(\frac{6c}{\Delta_a}\right)^{\frac{p}{p-1}} \left\{ -F^{-1}\left(\frac{1}{2T} \left(\frac{c}{\Delta_a}\right)^{\frac{p}{p-1}}\right) \right\}^{\frac{p}{p-1}} + 2 \left(\frac{c}{\Delta_a}\right)^{\frac{p}{p-1}} \\ \leq 2 \left(\frac{6c}{\Delta_a}\right)^{\frac{p}{p-1}} \left\{ -F^{-1}\left(\frac{1}{2T} \left(\frac{c}{\Delta_a}\right)^{\frac{p}{p-1}}\right) \right\}^{\frac{p}{p-1}} + 2 \left(\frac{c}{\Delta_a}\right)^{\frac{p}{p-1}}.$$

For  $T \leq 2\left(\frac{c}{\Delta_a}\right)^{\frac{p}{p-1}}$ ,

$$\sum_{t=1}^T \mathbb{P}\left(E_{t,a}^{(2)}\right) \leq T \leq 2 \left(\frac{c}{\Delta_a}\right)^{\frac{p}{p-1}} + 2 \left(\frac{6c}{\Delta_a}\right)^{\frac{p}{p-1}} \left\{ -F^{-1}\left(\frac{1}{T} \left(\frac{c}{\Delta_a}\right)^{\frac{p}{p-1}}\right) \right\}^{\frac{p}{p-1}}.$$

124 Thus, the upper bound also holds. By combining this upper bound, the Lemma is proved.  $\square$

125 Lastly, we estimate the upper bound of  $E_{t,a}^{(3)}$ .

126 **Lemma C.3.** Assume that the  $p$ -th moment of rewards is bounded by a constant  $\nu_p < \infty$ ,  $\hat{r}_{t,a}$  is a  
127  $p$ -robust estimator of (B.10) and  $F(x)$  satisfies Assumption 2. For any action  $a \in \mathcal{A}$ , it holds

$$\sum_{t=1}^T \mathbb{P}\left(E_{t,a}^{(3)}\right) \leq \left(\frac{3c}{\Delta_a}\right)^{\frac{p}{p-1}} \left\{ F^{-1}\left(1 - \frac{1}{T} \left(\frac{c}{\Delta_a}\right)^{\frac{p}{p-1}}\right) \right\}^{\frac{p}{p-1}} + 2 \left(\frac{c}{\Delta_a}\right)^{\frac{p}{p-1}}$$

128 *Proof.* Recall  $\tau_k$  from Lemma (C.1). Obviously,

$$\sum_{t=1}^T \mathbb{P} \left( E_{t,a}^{(3)} \right) \leq \sum_{k=1}^T \mathbb{P} \left( \hat{E}_{\tau_k,a} \cap \tilde{E}_{\tau_k,a}^c \right)$$

129 Due to the decision rule of the perturbation method and the definition of  $\tau_k$ , observe that  $n_{\tau_k,a} = k$   
 130 and  $\beta_{\tau_k,a} = \frac{c}{k^{1-\frac{1}{p}}}$ . By the conditioning on  $\mathcal{H}_{\tau_k}$ ,

$$\begin{aligned} \mathbb{P} \left( \hat{E}_{\tau_k,a} \cap \tilde{E}_{\tau_k,a}^c \mid \mathcal{H}_{\tau_k} \right) &\leq \mathbb{P} \left( \hat{r}_{\tau_k} \leq x_a, G_{\tau_k,a} > \frac{y_a - \hat{r}_{\tau_k,a}}{\beta_{\tau_k,a}} \mid \mathcal{H}_{\tau_k} \right) \\ &\leq \mathbb{P} \left( G_{\tau_k,a} > \frac{y_a - x_a}{\beta_{\tau_k,a}} \mid \mathcal{H}_{\tau_k} \right) \\ &= \mathbb{P} \left( G_{\tau_k,a} > \frac{\Delta_a k^{1-\frac{1}{p}}}{3c} \mid \mathcal{H}_{\tau_k} \right) = 1 - F \left( \frac{\Delta_a k^{1-\frac{1}{p}}}{3c} \right). \end{aligned} \quad (\text{C.18})$$

131 We first show that the bound holds for  $T > \left( \frac{c}{\Delta_a} \right)^{\frac{p}{p-1}}$  and check the case of  $T \leq \left( \frac{c}{\Delta_a} \right)^{\frac{p}{p-1}}$ .

132 For  $T > 2 \left( \frac{c}{\Delta_a} \right)^{\frac{p}{p-1}}$ , let  $\ell_+$  be the maximal time such as

$$F \left( \frac{\Delta_a \ell^{1-\frac{1}{p}}}{3c} \right) \leq 1 - \frac{1}{T} \left( \frac{c}{\Delta_a} \right)^{\frac{p}{p-1}}.$$

133 There exists a positive  $\ell_+$  since  $1 - \frac{1}{T} \left( \frac{c}{\Delta_a} \right)^{\frac{p}{p-1}} > \frac{1}{2}$  and the assumption  $F(0) < \frac{1}{2}$ . Note that

$$\ell_+ \leq \left( \frac{3c}{\Delta_a} \right)^{\frac{p}{p-1}} \left\{ F^{-1} \left( 1 - \frac{1}{T} \left( \frac{c}{\Delta_a} \right)^{\frac{p}{p-1}} \right) \right\}^{\frac{p}{p-1}}. \quad (\text{C.19})$$

134 and for  $k > \ell_+$

$$1 - F \left( \frac{\Delta_a k^{1-\frac{1}{p}}}{3c} \right) \leq \frac{1}{T} \left( \frac{c}{\Delta_a} \right)^{\frac{p}{p-1}}. \quad (\text{C.20})$$

135 Therefore, by (C.18), (C.19), and (C.20),

$$\begin{aligned} \sum_{k=1}^T \mathbb{P} \left( \hat{E}_{\tau_k,a} \cap \tilde{E}_{\tau_k,a}^c \right) &\leq \sum_{k=1}^T \left( 1 - F \left( \frac{\Delta_a k^{1-\frac{1}{p}}}{3c} \right) \right) \\ &\leq \ell_+ + \sum_{k=\ell_++1}^T \left( 1 - F \left( \frac{\Delta_a k^{1-\frac{1}{p}}}{3c} \right) \right) \\ &\leq \left( \frac{3c}{\Delta_a} \right)^{\frac{p}{p-1}} \left\{ F^{-1} \left( 1 - \frac{1}{T} \left( \frac{c}{\Delta_a} \right)^{\frac{p}{p-1}} \right) \right\}^{\frac{p}{p-1}} + \sum_{k=\ell_++1}^T \frac{1}{T} \left( \frac{c}{\Delta_a} \right)^{\frac{p}{p-1}} \\ &\leq \left( \frac{3c}{\Delta_a} \right)^{\frac{p}{p-1}} \left\{ F^{-1} \left( 1 - \frac{1}{T} \left( \frac{c}{\Delta_a} \right)^{\frac{p}{p-1}} \right) \right\}^{\frac{p}{p-1}} + 2 \left( \frac{c}{\Delta_a} \right)^{\frac{p}{p-1}}. \end{aligned}$$

136 For  $T \leq 2 \left( \frac{c}{\Delta_a} \right)^{\frac{p}{p-1}}$ ,

$$\sum_{t=1}^T \mathbb{P} \left( E_{t,a}^{(3)} \right) \leq T \leq 2 \left( \frac{c}{\Delta_a} \right)^{\frac{p}{p-1}} + \left( \frac{3c}{\Delta_a} \right)^{\frac{p}{p-1}} \left\{ F^{-1} \left( 1 - \frac{1}{T} \left( \frac{c}{\Delta_a} \right)^{\frac{p}{p-1}} \right) \right\}^{\frac{p}{p-1}}.$$

137 Thus, the bound also holds. Consequently, the lemma is proved.  $\square$

138 Finally, we prove Theorem 3 in the main paper.

**Theorem C.4.** Assume that  $p$ th moment of rewards is  $\nu_p < \infty$ . Consider  $\hat{r}_{t,a}$  is the proposed robust estimator and the perturbation method with a CDF  $F(g)$ . Then, cumulative regret is bounded as

$$O\left(\sum_{a \neq a^*} \frac{C_{c,p,\nu_p,F}}{\Delta_a^{\frac{1}{p-1}}} + \frac{(6c)^{\frac{p}{p-1}}}{\Delta_a^{\frac{1}{p-1}}} \left[-F^{-1}\left(\frac{c^{\frac{p}{p-1}}}{T\Delta_a^{\frac{p}{p-1}}}\right)\right]_{+}^{\frac{p}{p-1}} + \frac{(3c)^{\frac{p}{p-1}}}{\Delta_a^{\frac{1}{p-1}}} \left[F^{-1}\left(1 - \frac{c^{\frac{p}{p-1}}}{T\Delta_a^{\frac{p}{p-1}}}\right)\right]_{+}^{\frac{p}{p-1}} + \Delta_a\right)$$

139 where  $C_{c,p,\nu_p,F} > 0$  is a constant dependent on  $c, p, \nu_p, F$  and independent on  $T$ .

140 *Proof.* Recall the definition of regret  $\mathcal{R}_T$ , and the fact  $\mathbb{P}(a_t = a) = \mathbb{P}(E_{t,a}) = \sum_{i=1}^3 \mathbb{P}(E_{t,a}^{(i)})$ .  
141 Hence

$$\mathbb{E}[\mathcal{R}_T] := \sum_{a \in \mathcal{A}} \sum_{t=1}^T \Delta_a \mathbb{P}(a_t = a) = \sum_{a \neq a^*} \sum_{i=1}^3 \sum_{t=1}^T \Delta_a \mathbb{P}(E_{t,a}^{(i)}) \quad (\text{C.21})$$

142 By Lemmas C.1, C.2, and C.3,

$$\sum_{t=1}^T \Delta_a \mathbb{P}(E_{t,a}^{(1)}) \leq \Delta_a + \exp\left(\frac{b_p \nu_p}{2c^p}\right) \left(\frac{(3c)^p}{\Delta_a}\right)^{\frac{1}{p-1}} \Gamma\left(\frac{2p-1}{p-1}\right).$$

143

$$\begin{aligned} \sum_{t=1}^T \Delta_a \mathbb{P}(E_{t,a}^{(2)}) &\leq \exp\left(\frac{b_p \nu_p}{2c^p}\right) \left\{C + \frac{F(0)}{1-F(0)} + 2^{\frac{2p-1}{p-1}}\right\} \Gamma\left(\frac{2p-1}{p-1}\right) \left(\frac{(3c)^p}{\Delta_a}\right)^{\frac{1}{p-1}} \\ &\quad + 2 \left(\frac{(6c)^p}{\Delta_a}\right)^{\frac{1}{p-1}} \left\{-F^{-1}\left(\frac{1}{T} \left(\frac{c}{\Delta_a}\right)^{\frac{p}{p-1}}\right)\right\}_{+}^{\frac{p}{p-1}} + 2 \left(\frac{c^p}{\Delta_a}\right)^{\frac{1}{p-1}} \end{aligned}$$

144

$$\sum_{t=1}^T \Delta_a \mathbb{P}(E_{t,a}^{(3)}) \leq \left(\frac{(3c)^p}{\Delta_a}\right)^{\frac{1}{p-1}} \left\{F^{-1}\left(1 - \frac{1}{T} \left(\frac{c}{\Delta_a}\right)^{\frac{p}{p-1}}\right)\right\}_{+}^{\frac{p}{p-1}} + 2 \left(\frac{c^p}{\Delta_a}\right)^{\frac{1}{p-1}}$$

145 Therefore, we can estimate the upper bound of (C.21) by combining the above results as follows

$$\begin{aligned} \mathbb{E}[\mathcal{R}_T] &\leq \sum_{a \neq a^*} \left[ \exp\left(\frac{b_p \nu_p}{2c^p}\right) \left\{C + \frac{F(0)}{1-F(0)} + 2^{\frac{2p-1}{p-1}} + 1\right\} \Gamma\left(\frac{2p-1}{p-1}\right) \left(\frac{(3c)^p}{\Delta_a}\right)^{\frac{1}{p-1}} \right. \\ &\quad + 2 \left(\frac{(6c)^p}{\Delta_a}\right)^{\frac{1}{p-1}} \left\{-F^{-1}\left(\frac{1}{T} \left(\frac{c}{\Delta_a}\right)^{\frac{p}{p-1}}\right)\right\}_{+}^{\frac{p}{p-1}} \\ &\quad + \left(\frac{(3c)^p}{\Delta_a}\right)^{\frac{1}{p-1}} \left\{F^{-1}\left(1 - \frac{1}{T} \left(\frac{c}{\Delta_a}\right)^{\frac{p}{p-1}}\right)\right\}_{+}^{\frac{p}{p-1}} \\ &\quad \left. + 4 \left(\frac{c^p}{\Delta_a}\right)^{\frac{1}{p-1}} + \Delta_a \right] \\ &\leq O\left(\sum_{a \neq a^*} \frac{C_{c,p,\nu_p,F}}{\Delta_a^{\frac{1}{p-1}}} + \frac{(6c)^{\frac{p}{p-1}}}{\Delta_a^{\frac{1}{p-1}}} \left[-F^{-1}\left(\frac{c^{\frac{p}{p-1}}}{T\Delta_a^{\frac{p}{p-1}}}\right)\right]_{+}^{\frac{p}{p-1}} \right. \\ &\quad \left. + \frac{(3c)^{\frac{p}{p-1}}}{\Delta_a^{\frac{1}{p-1}}} \left[F^{-1}\left(1 - \frac{c^{\frac{p}{p-1}}}{T\Delta_a^{\frac{p}{p-1}}}\right)\right]_{+}^{\frac{p}{p-1}} + \Delta_a\right) \end{aligned}$$

146 The theorem is proved.  $\square$

147 **C.2 Regret Lower Bounds**

148 **Theorem C.5.** For  $0 < c < \frac{K-1}{K-1+2^{\frac{p}{p-1}}}$  and  $T \geq \frac{c^{\frac{1}{p-1}}(K-1)}{2^{\frac{p}{p-1}}} |F^{-1}(1 - \frac{1}{K})|^{\frac{p}{p-1}}$ , there exists a  
 149  $K$ -armed stochastic bandit problem for which the regret of APE-RE has the following lower bound:

$$\mathbb{E}[\mathcal{R}_T] \geq \Omega \left( K^{1-\frac{1}{p}} T^{\frac{1}{p}} F^{-1} \left( 1 - \frac{1}{K} \right) \right) \quad (\text{C.22})$$

150 *Proof.* We construct a  $K$ -armed multi-armed bandit problem with deterministic rewards of which  
 151 the regret analysis presents the regret bound (C.22). Let the optimal arm  $a^*$  give the reward of  
 152  $\Delta = \frac{1}{2} c^{\frac{1}{p}} \left( \frac{K-1}{T} \right)^{1-\frac{1}{p}} F^{-1} \left( 1 - \frac{1}{K} \right)$  whereas the other arms provide zero rewards. Note that  
 153  $\Delta \in [0, 1]$  for  $T \geq \frac{c^{\frac{1}{p-1}}(K-1)}{2^{\frac{p}{p-1}}} |F^{-1}(1 - \frac{1}{K})|^{\frac{p}{p-1}}$  and the estimator becomes  $\hat{r}_a = \Delta \mathbb{I}[a = a^*]$   
 154 since there is no noise. Let  $E_t$  be the set of events which satisfy

$$\sum_{a \neq a^*} n_{t,a} \leq cT$$

155 If  $\mathbb{P}(E_t) \leq 1/2$  holds for some  $t \in [1, \dots, T]$ , then the regret bound is computed as follows

$$\mathbb{E}[\mathcal{R}_T] \geq \frac{1}{2} \mathbb{E}[\mathcal{R}_t | E_t^c] \geq \frac{cT}{2} \Delta = \frac{c^{1+\frac{1}{p}}}{4} (K-1)^{1-\frac{1}{p}} T^{\frac{1}{p}} F^{-1} \left( 1 - \frac{1}{K} \right)$$

156 hence it satisfies (C.22). Otherwise, if  $\mathbb{P}(E_t) > 1/2$  holds for all  $t \in [1, \dots, T]$ , it is sufficient to  
 157 prove  $\mathbb{P}(a_t \neq a^*) \geq 1/8$ . Then, it holds

$$\mathbb{E}[\mathcal{R}_T] = \sum_{t=1}^T \Delta \mathbb{P}(a_t \neq a^*) \geq \frac{T}{8} \Delta = \frac{c^{\frac{1}{p}}}{16} (K-1)^{1-\frac{1}{p}} T^{\frac{1}{p}} F^{-1} \left( 1 - \frac{1}{K} \right)$$

158 and we get the desired result since  $0 < c < \frac{K-1}{K-1+2^{\frac{p}{p-1}}}$ .

159 Now, the remaining part is to prove that  $\mathbb{P}(a_t \neq a^*) \geq 1/8$  holds. First, we observe that

$$\begin{aligned} \mathbb{P}(a_t \neq a^*) &= \mathbb{P} \left( \bigcup_{a \neq a^*} \{ \hat{r}_{a^*} + \beta_{t,a^*} G_{t,a^*} \leq \hat{r}_a + \beta_{t,a} G_{t,a} \} \right) \\ &\geq \mathbb{P}(E_{t-1}) \mathbb{P} \left( \bigcup_{a \neq a^*} \{ \hat{r}_{a^*} + \beta_{t,a^*} G_{t,a^*} \leq 2\Delta \leq \hat{r}_a + \beta_{t,a} G_{t,a} \} \middle| E_{t-1} \right) \\ &\geq \frac{1}{2} \mathbb{E} \left[ \mathbb{P} \left( G_{t,a^*} \leq \frac{\Delta}{\beta_{t,a^*}} \middle| \mathcal{H}_{t-1}, E_{t-1} \right) \mathbb{P} \left( \bigcup_{a \neq a^*} \{ 2\Delta \leq \beta_{t,a} G_{t,a} \} \middle| \mathcal{H}_{t-1}, E_{t-1} \right) \middle| E_{t-1} \right] \\ &\geq \frac{1}{2} \mathbb{E} \left[ \mathbb{P} \left( G_{t,a^*} \leq \frac{\Delta ((1-c)T)^{1-\frac{1}{p}}}{c} \middle| \mathcal{H}_{t-1}, E_{t-1} \right) \right. \\ &\quad \left. \times \mathbb{P} \left( \bigcup_{a \neq a^*} \{ 2\Delta \leq \beta_{t,a} G_{t,a} \} \middle| \mathcal{H}_{t-1}, E_{t-1} \right) \middle| E_{t-1} \right] \end{aligned}$$

160 where the last inequality holds due to  $n_{t-1,a^*} \geq (1-c)T$  provided  $E_{t-1}$ . Since  $c < \frac{K-1}{K-1+2^{\frac{p}{p-1}}}$ ,  
 161 we have,

$$\frac{\Delta ((1-c)T)^{1-\frac{1}{p}}}{c} = \left( \frac{(1-c)(K-1)}{2^{\frac{p}{p-1}} c} \right)^{1-\frac{1}{p}} F^{-1} \left( 1 - \frac{1}{K} \right) > F^{-1} \left( 1 - \frac{1}{K} \right).$$

162 Hence,  $\mathbb{P}\left(G_{t,a^*} \leq \frac{\Delta((1-c)T)^{1-\frac{1}{p}}}{c} \mid \mathcal{H}_{t-1}, E_{t-1}\right) \geq 1 - \frac{1}{K}$  so that

$$\mathbb{P}(a_t \neq a^*) \geq \frac{1}{2} \left(1 - \frac{1}{K}\right) \mathbb{E} \left[ \mathbb{P} \left( \bigcup_{a \neq a^*} \{2\Delta \leq \beta_{t,a} G_{t,a}\} \mid \mathcal{H}_{t-1}, E_{t-1} \right) \mid E_{t-1} \right].$$

163 Observe that

$$\begin{aligned} & \mathbb{P} \left( \bigcup_{a \neq a^*} \{2\Delta \leq \beta_{t,a} G_{t,a}\} \mid \mathcal{H}_{t-1}, E_{t-1} \right) \\ & \geq 1 - \mathbb{P} \left( \bigcap_{a \neq a^*} \left\{ G_{t,a} \leq \frac{2\Delta}{\beta_{t,a}} \right\} \mid \mathcal{H}_{t-1}, E_{t-1} \right) \\ & \geq 1 - \prod_{a \neq a^*} F \left( \frac{2\Delta (n_{t-1,a})^{1-\frac{1}{p}}}{c} \right) \\ & \geq 1 - \left| F \left( 2\Delta \frac{\sum_{a \neq a^*} (n_{t-1,a})^{1-\frac{1}{p}}}{c(K-1)} \right) \right|^{K-1}, \end{aligned}$$

164 where the last inequality holds by the log-concavity of  $F$ . Under  $E_{t-1}$ , note that

$$\sum_{a \neq a^*} (n_{t-1,a})^{1-\frac{1}{p}} \leq \left( \sum_{a \neq a^*} 1^p \right)^{\frac{1}{p}} \left( \sum_{a \neq a^*} n_{t-1,a} \right)^{1-\frac{1}{p}} \leq (K-1)^{\frac{1}{p}} (cT)^{1-\frac{1}{p}}$$

165 which implies

$$F \left( 2\Delta \frac{\sum_{a \neq a^*} (n_{t-1,a})^{1-\frac{1}{p}}}{c(K-1)} \right) \leq F \left( 2\Delta c^{-\frac{1}{p}} \left( \frac{T}{(K-1)} \right)^{1-\frac{1}{p}} \right) = 1 - \frac{1}{K}$$

166 Therefore, we get

$$\mathbb{P}(a_t \neq a^*) \geq \frac{1}{2} \left(1 - \frac{1}{K}\right) \left(1 - \left(1 - \frac{1}{K}\right)^{K-1}\right) \geq \frac{1}{8}$$

167 since  $1 - \frac{1}{K} \geq \frac{1}{2}$  and  $1 - \left(1 - \frac{1}{K}\right)^{K-1} \geq \frac{1}{2}$  hold for  $K \geq 2$  and the theorem is proved.  $\square$

## 168 D Regret Bounds of Specific Perturbations

**Corollary D.1.** *Suppose  $G$  follows a Weibull distribution with a parameter  $k \leq 1$  with  $\lambda > 1$  with  $c > 0$ . Then, the problem dependent regret bound is*

$$\mathbb{E}[\mathcal{R}_T] \leq O \left( \sum_{a \neq a^*} \frac{C_{c,p,\nu_p,F}}{\Delta_a^{\frac{1}{p-1}}} + \left( \frac{(3c\lambda)^p}{\Delta_a} \right)^{\frac{1}{p-1}} \left[ \ln \left( \frac{T \Delta_a^{\frac{p}{p-1}}}{c^{p-1}} \right) \right]^{\frac{p}{k(p-1)}} + \Delta_a \right).$$

169 The problem independent regret bound is,  $\mathbb{E}[\mathcal{R}_T] = \Theta \left( \lambda^{\frac{p}{p-1}} K^{1-\frac{1}{p}} T^{\frac{1}{p}} \ln(K)^{\frac{1}{k}} \right)$ .

170 The minimum rate is achieved at  $k = 1$ ,  $\mathbb{E}[\mathcal{R}_T] = \Theta \left( K^{1-\frac{1}{p}} T^{\frac{1}{p}} \ln(K) \right)$ .

*Proof.* The CDF of a Weibull distribution with  $k \leq 1$  is given as

$$F(x) = 1 - \exp \left( - \left( \frac{x}{\lambda} \right)^k \right)$$

Then, its inverse is

$$F^{-1}(y) = \lambda \left[ \ln \left( \frac{1}{1-y} \right) \right]^{\frac{1}{k}},$$

Then,

$$F^{-1} \left( 1 - \frac{c^{\frac{p}{p-1}}}{T \Delta_a^{\frac{p}{p-1}}} \right)^{\frac{p}{p-1}} = \lambda^{\frac{p}{p-1}} \left[ \ln \left( \frac{T \Delta_a^{\frac{p}{p-1}}}{c^{\frac{p}{p-1}}} \right) \right]^{\frac{p}{k(p-1)}}.$$

171 Thus, we compute  $C$  as follows,

$$\begin{aligned} \int_0^\infty \frac{h(z) \exp(-z)}{1-F(z)} dz &= \int_0^\infty \frac{k}{\lambda} \left( \frac{z}{\lambda} \right)^{k-1} \frac{\exp\left(-\left(\frac{z}{\lambda}\right)^k\right) \exp(-z)}{\exp\left(-2\left(\frac{z}{\lambda}\right)^k\right)} dz \\ &= \int_0^\infty \frac{k}{\lambda} \left( \frac{z}{\lambda} \right)^{k-1} \exp\left(-z + \left(\frac{z}{\lambda}\right)^k\right) dz \\ &\leq \int_0^\infty \frac{k}{\lambda} \left( \frac{z}{\lambda} \right)^{k-1} \exp\left(-\frac{\lambda-1}{\lambda} z\right) dz \\ &= \frac{k}{(\lambda-1)^k} \int_0^\infty z^{k-1} \exp(-z) dz = \frac{k\Gamma(k)}{(\lambda-1)^k} = \frac{\Gamma(k+1)}{(\lambda-1)^k} \\ &\leq \frac{\Gamma(2)}{(\lambda-1)^k} = (\lambda-1)^{-k}. \end{aligned}$$

For  $\frac{(6c)^{\frac{p}{p-1}}}{\Delta_a^{\frac{1}{p-1}}} \left[ -F^{-1} \left( \frac{c^{\frac{p}{p-1}}}{T \Delta_a^{\frac{p}{p-1}}} \right) \right]_+^{\frac{p}{p-1}}$ , we have,

$$\frac{(6c)^{\frac{p}{p-1}}}{\Delta_a^{\frac{1}{p-1}}} \left[ -F^{-1} \left( \frac{c^{\frac{p}{p-1}}}{T \Delta_a^{\frac{p}{p-1}}} \right) \right]_+^{\frac{p}{p-1}} = 0$$

172 since the support of  $x$  is  $(0, \infty)$ . Then, the problem dependent regret bound becomes,

$$\mathbb{E}[\mathcal{R}_T] \leq \sum_{a \neq a^*} \left[ \exp\left(\frac{b_p \nu_p}{2c^p}\right) \left\{ C_1 + \frac{F(0)}{1-F(0)} + 2^{\frac{2p-1}{p-1}} + 1 \right\} \Gamma\left(\frac{2p-1}{p-1}\right) \left(\frac{(3c)^p}{\Delta_a}\right)^{\frac{1}{p-1}} \right] \quad (\text{D.1})$$

$$+ \frac{(6c)^{\frac{p}{p-1}}}{\Delta_a^{\frac{1}{p-1}}} \left[ -F^{-1} \left( \frac{c^{\frac{p}{p-1}}}{T \Delta_a^{\frac{p}{p-1}}} \right) \right]_+^{\frac{p}{p-1}} \quad (\text{D.2})$$

$$+ \left(\frac{(3c)^p}{\Delta_a}\right)^{\frac{1}{p-1}} \left\{ F^{-1} \left( 1 - \frac{1}{T} \left(\frac{c}{\Delta_a}\right)^{\frac{p}{p-1}} \right) \right\}^{\frac{p}{p-1}} \quad (\text{D.3})$$

$$+ \left(\frac{c^p}{\Delta_a}\right)^{\frac{1}{p-1}} + \Delta_a \quad (\text{D.4})$$

$$\leq \sum_{a \neq a^*} \left[ \exp\left(\frac{b_p \nu_p}{2c^p}\right) \left[ (\lambda-1)^{-k} + 2^{\frac{2p-1}{p-1}} + 1 \right] \Gamma\left(\frac{2p-1}{p-1}\right) \left(\frac{(3c)^p}{\Delta_a}\right)^{\frac{1}{p-1}} \right] \quad (\text{D.5})$$

$$+ \left(\frac{(3c\lambda)^p}{\Delta_a}\right)^{\frac{1}{p-1}} \left[ \ln \left( \frac{T \Delta_a^{\frac{p}{p-1}}}{c^{\frac{p}{p-1}}} \right) \right]^{\frac{p}{k(p-1)}} + \left(\frac{c^p}{\Delta_a}\right)^{\frac{1}{p-1}} + \Delta_a \quad (\text{D.6})$$

$$\leq O \left( \sum_{a \neq a^*} \frac{C_{c,p,\nu_p,F}}{\Delta_a^{\frac{1}{p-1}}} + \left(\frac{(3c\lambda)^p}{\Delta_a}\right)^{\frac{1}{p-1}} \left[ \ln \left( \frac{T \Delta_a^{\frac{p}{p-1}}}{c^{\frac{p}{p-1}}} \right) \right]^{\frac{p}{k(p-1)}} + \Delta_a \right). \quad (\text{D.7})$$



173 The problem independent regret bound can be obtained by choosing the threshold of the minimum  
 174 gap as  $\Delta = c(K/T)^{1-\frac{1}{p}} \ln(K)^{\frac{1}{k}}$ .

$$\mathbb{E}[\mathcal{R}_T] \leq \sum_{a \neq a^*, \Delta_a > \Delta} \frac{C_{c,p,\nu_p,F}}{\Delta_a^{\frac{1}{p-1}}} + \left( \frac{(3c\lambda)^p}{\Delta_a} \right)^{\frac{1}{p-1}} \left[ \ln \left( \frac{T \Delta_a^{\frac{p}{p-1}}}{c^{\frac{p}{p-1}}} \right) \right]^{\frac{p}{k(p-1)}} + \Delta T \quad (\text{D.8})$$

$$\leq K \left( \frac{C_{c,p,\nu_p,F}}{\Delta^{\frac{1}{p-1}}} + \left( \frac{(3c\lambda)^p}{\Delta} \right)^{\frac{1}{p-1}} \left[ \ln \left( \frac{T \Delta^{\frac{p}{p-1}}}{c^{\frac{p}{p-1}}} \right) \right]^{\frac{p}{k(p-1)}} \right) + \Delta T \quad (\text{D.9})$$

$$\leq K \frac{C_{c,p,\nu_p,F} \cdot T^{\frac{1}{p}}}{K^{\frac{1}{p}} \ln(K)^{\frac{1}{k(p-1)}}} + K \left( \frac{(3\lambda)^{\frac{p}{p-1}} c T^{\frac{1}{p}}}{K^{\frac{1}{p}} \ln(K)^{\frac{1}{k(p-1)}}} \right) \left[ \ln \left( K \ln(K)^{\frac{p}{k(p-1)}} \right) \right]^{\frac{p}{k(p-1)}} \quad (\text{D.10})$$

$$+ cK^{1-\frac{1}{p}} T^{\frac{1}{p}} \ln(K)^{\frac{1}{k}} \quad (\text{D.11})$$

$$\leq \frac{C_{c,p,\nu_p,F} \cdot K^{1-\frac{1}{p}} T^{\frac{1}{p}}}{\ln(K)^{\frac{1}{k(p-1)}}} + c(3\lambda)^{\frac{p}{p-1}} K^{1-\frac{1}{p}} T^{\frac{1}{p}} \left( \frac{\left[ \left(1 + \frac{p}{k(p-1)}\right) \ln(K) \right]^{\frac{p}{k(p-1)}}}{\ln(K)^{\frac{1}{k(p-1)}}} \right) \quad (\text{D.12})$$

$$+ cK^{1-\frac{1}{p}} T^{\frac{1}{p}} \ln(K)^{\frac{1}{k}} \quad (\text{D.13})$$

$$\leq O \left( (c\lambda)^{\frac{p}{p-1}} K^{1-\frac{1}{p}} T^{\frac{1}{p}} \left( \frac{\ln(K)^{\frac{p}{k(p-1)}}}{\ln(K)^{\frac{1}{k(p-1)}}} \right) \right) = O \left( (c\lambda)^{\frac{p}{p-1}} K^{1-\frac{1}{p}} T^{\frac{1}{p}} \ln(K)^{\frac{1}{k}} \right). \quad (\text{D.14})$$

175 Consequently, the lower bound is simply obtained by Theorem C.5, so we can conclude that regret  
 176 bound is tight. The corollary is proved.  $\square$

**Corollary D.2.** Suppose  $G$  follows a generalized extreme value distribution with a parameter with  $0 \leq \zeta < 1$  and  $\lambda > 1$ . Then, the problem dependent regret bound is

$$\mathbb{E}[\mathcal{R}_T] \leq O \left( \sum_{a \neq a^*} \frac{C_{c,p,\nu_p,F}}{\Delta_a^{\frac{1}{p-1}}} + 2 \left( \frac{(6c\lambda)^p}{\Delta_a} \right)^{\frac{1}{p-1}} \ln_{\zeta} \left( \frac{T \Delta_a^{\frac{p}{p-1}}}{c^{\frac{p}{p-1}}} \right)^{\frac{p}{p-1}} + \Delta_a \right).$$

Let  $\ln_{\zeta}(x) := \frac{x^{\zeta}-1}{\zeta}$ , then, the problem independent regret bound is

$$\Omega \left( K^{1-\frac{1}{p}} T^{\frac{1}{p}} \ln_{\zeta}(K) \right) \leq \mathbb{E}[\mathcal{R}_T] \leq O \left( K^{1-\frac{1}{p}} T^{\frac{1}{p}} \frac{\ln_{\zeta} \left( K^{\frac{2p-1}{p-1}} \right)^{\frac{p}{p-1}}}{\ln_{\zeta}(K)^{\frac{1}{p-1}}} \right).$$

177 The minimum rate is achieved at  $\zeta = 0$ ,  $\mathbb{E}[\mathcal{R}_T] = \Theta \left( K^{1-\frac{1}{p}} T^{\frac{1}{p}} \ln(K) \right)$ .

*Proof.* The CDF of a generalized extreme value distribution with  $0 \leq \zeta < 1$  is given as

$$F(x) = \exp \left( - \left( 1 + \zeta \frac{x}{\lambda} \right)^{-1/\zeta} \right).$$

Then, its inverse is

$$F^{-1}(y) = \lambda \frac{[\ln(1/y)]^{-\zeta} - 1}{\zeta} \leq \lambda \frac{[1-y]^{-\zeta} - 1}{\zeta},$$

and

$$\lambda \frac{[\ln(1/y)]^{-\zeta} - 1}{\zeta} \geq \lambda \frac{\left[ \frac{y}{1-y} \right]^{\zeta} - 1}{\zeta}$$

where  $\ln(x) \leq x - 1$  is used. Then,

$$\left[ F^{-1} \left( 1 - \frac{c^{\frac{p}{p-1}}}{T \Delta_a^{\frac{p}{p-1}}} \right) \right]^{\frac{p}{p-1}} \leq \lambda^{\frac{p}{p-1}} \left[ \frac{\left( T \Delta_a^{\frac{p}{p-1}} / c^{\frac{p}{p-1}} \right)^{\zeta} - 1}{\zeta} \right]^{\frac{p}{p-1}}.$$

178 We compute the sup  $h$  can be obtained as follows,

$$\begin{aligned} \sup h &= \sup_{x \in [0, \infty]} \frac{(1 + \zeta \frac{x}{\lambda})^{-1/\zeta-1} \exp\left(-\left(1 + \zeta \frac{x}{\lambda}\right)^{-1/\zeta}\right)}{\lambda \left(1 - \exp\left(-\left(1 + \zeta \frac{x}{\lambda}\right)^{-1/\zeta}\right)\right)} \\ &= \sup_{t \in [0, 1]} \frac{t^{\zeta+1} \exp(-t)}{\lambda(1 - \exp(-t))} \leq \sup_{t \in [0, 1]} \frac{t \exp(-t)}{\lambda(1 - \exp(-t))} = \frac{1}{\lambda}. \end{aligned}$$

179  $M$  can be obtained as,

$$\begin{aligned} \int_0^\infty \frac{\exp(-z)}{1 - F(z)} dz &= \int_0^\infty \frac{\exp(-z)}{1 - \exp\left(-\left(1 + \zeta \frac{z}{\lambda}\right)^{-1/\zeta}\right)} dz \\ &\leq \int_0^\infty \left(1 + \left(1 + \zeta \frac{z}{\lambda}\right)^{1/\zeta}\right) \exp(-z) dz \\ &= 1 + \int_0^\infty \left(1 + \zeta \frac{z}{\lambda}\right)^{1/\zeta} \exp(-z) dz \\ &\leq 1 + \int_0^\infty \exp\left(-z + \frac{\ln(1 + \zeta \frac{z}{\lambda})}{\zeta}\right) dz \\ &\leq 1 + \int_0^\infty \exp\left(-z + \frac{z}{\lambda}\right) dz \\ &= 1 + \frac{\lambda}{\lambda - 1} \quad \because \lambda > 1 \\ &= \frac{2\lambda - 1}{\lambda - 1} =: M_1. \end{aligned}$$

180 Hence,  $\sup h \cdot M_1 \leq \frac{2\lambda-1}{\lambda(\lambda-1)} \leq \frac{2}{\lambda-1}$ .

181 For  $\frac{(6c)^{\frac{p}{p-1}}}{\Delta_a^{\frac{1}{p-1}}} \left[-F^{-1}\left(\frac{c^{\frac{p}{p-1}}}{T\Delta_a^{\frac{p}{p-1}}}\right)\right]_+^{\frac{p}{p-1}}$ , we have,

$$\begin{aligned} \frac{(6c)^{\frac{p}{p-1}}}{\Delta_a^{\frac{1}{p-1}}} \left[-F^{-1}\left(\frac{c^{\frac{p}{p-1}}}{T\Delta_a^{\frac{p}{p-1}}}\right)\right]_+^{\frac{p}{p-1}} &= \frac{(6c\lambda)^{\frac{p}{p-1}}}{\Delta_a^{\frac{1}{p-1}}} \left[\frac{1 - \ln\left(\frac{T\Delta_a^{\frac{p}{p-1}}}{c^{\frac{p}{p-1}}}\right)^{-\zeta}}{\zeta}\right]^{\frac{p}{p-1}} \\ &\leq \frac{(6c\lambda)^{\frac{p}{p-1}}}{\Delta_a^{\frac{1}{p-1}}} \left[\frac{\ln\left(\frac{T\Delta_a^{\frac{p}{p-1}}}{c^{\frac{p}{p-1}}}\right)^\zeta - 1}{\zeta}\right]^{\frac{p}{p-1}} \\ &\leq \frac{(6c\lambda)^{\frac{p}{p-1}}}{\Delta_a^{\frac{1}{p-1}}} \left[\frac{\left(\frac{T\Delta_a^{\frac{p}{p-1}}}{c^{\frac{p}{p-1}}}\right)^\zeta - 1}{\zeta}\right]^{\frac{p}{p-1}} \\ &\leq \frac{(6c\lambda)^{\frac{p}{p-1}}}{\Delta_a^{\frac{1}{p-1}}} \ln_\zeta\left(\frac{T\Delta_a^{\frac{p}{p-1}}}{c^{\frac{p}{p-1}}}\right)^{\frac{p}{p-1}}, \end{aligned}$$

182 where  $-\ln_\zeta(1/\ln(x)) \leq \ln_\zeta(\ln(x)) \leq \ln_\zeta(x)$  is used.

183 Then, the problem dependent regret bound becomes,

$$\mathbb{E} [\mathcal{R}_T] \leq \sum_{a \neq a^*} \left[ \exp \left( \frac{b_p \nu_p}{2c^p} \right) \left\{ \|h\|_\infty M + \frac{F(0)}{1-F(0)} + 2^{\frac{2p-1}{p-1}} + 1 \right\} \Gamma \left( \frac{2p-1}{p-1} \right) \left( \frac{(3c)^p}{\Delta_a} \right)^{\frac{1}{p-1}} \right] \quad (\text{D.15})$$

$$+ \frac{(6c)^{\frac{p}{p-1}}}{\Delta_a^{\frac{1}{p-1}}} \left[ -F^{-1} \left( \frac{c^{\frac{p}{p-1}}}{T \Delta_a^{\frac{p}{p-1}}} \right) \right]_+^{\frac{p}{p-1}} \quad (\text{D.16})$$

$$+ \left( \frac{(3c)^p}{\Delta_a} \right)^{\frac{1}{p-1}} \left[ F^{-1} \left( 1 - \frac{1}{T} \left( \frac{c}{\Delta_a} \right)^{\frac{p}{p-1}} \right) \right]_+^{\frac{p}{p-1}} \quad (\text{D.17})$$

$$+ \left( \frac{c^p}{\Delta_a} \right)^{\frac{1}{p-1}} + \Delta_a \quad (\text{D.18})$$

$$\leq \sum_{a \neq a^*} \left[ \exp \left( \frac{b_p \nu_p}{2c^p} \right) \left[ \frac{2}{\lambda-1} + \frac{e}{e-1} + 2^{\frac{2p-1}{p-1}} + 1 \right] \Gamma \left( \frac{2p-1}{p-1} \right) \left( \frac{(3c)^p}{\Delta_a} \right)^{\frac{1}{p-1}} \right] \quad (\text{D.19})$$

$$+ \frac{(6c\lambda)^{\frac{p}{p-1}}}{\Delta_a^{\frac{1}{p-1}}} \ln_\zeta \left( \frac{T \Delta_a^{\frac{p}{p-1}}}{c^{\frac{p}{p-1}}} \right)^{\frac{p}{p-1}} + \left( \frac{(3c\lambda)^p}{\Delta_a} \right)^{\frac{1}{p-1}} \ln_\zeta \left( \frac{T \Delta_a^{\frac{p}{p-1}}}{c^{\frac{p}{p-1}}} \right)^{\frac{p}{p-1}} \quad (\text{D.20})$$

$$+ \left( \frac{c^p}{\Delta_a} \right)^{\frac{1}{p-1}} + \Delta_a \quad (\text{D.21})$$

$$\leq O \left( \sum_{a \neq a^*} \frac{C_{c,p,\nu_p,F}}{\Delta_a^{\frac{1}{p-1}}} + 2 \left( \frac{(6c\lambda)^p}{\Delta_a} \right)^{\frac{1}{p-1}} \ln_\zeta \left( \frac{T \Delta_a^{\frac{p}{p-1}}}{c^{\frac{p}{p-1}}} \right)^{\frac{p}{p-1}} + \Delta_a \right), \quad (\text{D.22})$$

184 where  $\ln_\zeta(x) := \frac{x^\zeta - 1}{\zeta}$ .

185 The problem independent regret bound can be obtained by choosing the threshold of the minimum

186 gap as  $\Delta = c \left( \frac{K}{T} \right)^{1-\frac{1}{p}} \ln_\zeta(K)$  Note that  $\lim_{\zeta \rightarrow 0} \frac{x^\zeta - 1}{\zeta} = \ln(x)$

$$\mathbb{E} [\mathcal{R}_T] \leq \sum_{\Delta_a > \Delta} \left[ \exp \left( \frac{b_p \nu_p}{2c^p} \right) \left[ \frac{\lambda+1}{\lambda-1} + \frac{e}{e-1} + 2^{\frac{2p-1}{p-1}} \right] \Gamma \left( \frac{2p-1}{p-1} \right) \left( \frac{(3c)^p}{\Delta_a} \right)^{\frac{1}{p-1}} \right] \quad (\text{D.23})$$

$$+ 2 \left( \frac{(6c\lambda)^p}{\Delta_a} \right)^{\frac{1}{p-1}} \ln_\zeta \left( \frac{T \Delta_a^{\frac{p}{p-1}}}{c^{\frac{p}{p-1}}} \right)^{\frac{p}{p-1}} \quad (\text{D.24})$$

$$+ \left( \frac{c^p}{\Delta_a} \right)^{\frac{1}{p-1}} \right] + \Delta T \quad (\text{D.25})$$

$$\leq K \left[ \exp \left( \frac{b_p \nu_p}{2c^p} \right) \left[ \frac{\lambda+1}{\lambda-1} + \frac{e}{e-1} + 2^{\frac{2p-1}{p-1}} \right] \Gamma \left( \frac{2p-1}{p-1} \right) \left( \frac{(3c)^p}{\Delta} \right)^{\frac{1}{p-1}} \right] \quad (\text{D.26})$$

$$+ 2 \left( \frac{(6c\lambda)^p}{\Delta} \right)^{\frac{1}{p-1}} \ln_\zeta \left( \frac{T \Delta^{\frac{p}{p-1}}}{c^{\frac{p}{p-1}}} \right)^{\frac{p}{p-1}} \quad (\text{D.27})$$

$$+ \left( \frac{c^p}{\Delta} \right)^{\frac{1}{p-1}} \right] + \Delta T \quad (\text{D.28})$$

$$\leq \exp \left( \frac{b_p \nu_p}{2c^p} \right) \left[ \frac{\lambda+1}{\lambda-1} + \frac{e}{e-1} + 2^{\frac{2p-1}{p-1}} \right] \Gamma \left( \frac{2p-1}{p-1} \right) (3\lambda)^{\frac{p}{p-1}} \frac{cK^{1-\frac{1}{p}} T^{\frac{1}{p}}}{\ln_\zeta(K)^{\frac{1}{p-1}}} \quad (\text{D.29})$$

$$+ 2(6\lambda)^{\frac{p}{p-1}} cK^{1-\frac{1}{p}} T^{\frac{1}{p}} \left( \frac{\ln_{\zeta} \left( K \ln_{\zeta}(K)^{\frac{p}{p-1}} \right)^{\frac{p}{p-1}}}{\ln_{\zeta}(K)^{\frac{1}{p-1}}} \right) \quad (\text{D.30})$$

$$+ c \frac{K^{1-\frac{1}{p}} T^{\frac{1}{p}}}{\ln_{\zeta}(K)^{\frac{1}{p-1}}} + cK^{1-\frac{1}{p}} T^{\frac{1}{p}} \ln_{\zeta}(K) \quad (\text{D.31})$$

$$\leq \exp \left( \frac{b_p \nu_p}{2c^p} \right) \left[ \frac{\lambda + 1}{\lambda - 1} + \frac{e}{e - 1} + 2^{\frac{2p-1}{p-1}} \right] \Gamma \left( \frac{2p-1}{p-1} \right) (3\lambda)^{\frac{p}{p-1}} \frac{cK^{1-\frac{1}{p}} T^{\frac{1}{p}}}{\ln_{\zeta}(K)^{\frac{1}{p-1}}} \quad (\text{D.32})$$

$$+ 2(6\lambda)^{\frac{p}{p-1}} cK^{1-\frac{1}{p}} T^{\frac{1}{p}} \left( \frac{\ln_{\zeta} \left( K^{\frac{2p-1}{p-1}} \right)^{\frac{p}{p-1}}}{\ln_{\zeta}(K)^{\frac{1}{p-1}}} \right) \quad (\text{D.33})$$

$$+ c \frac{K^{1-\frac{1}{p}} T^{\frac{1}{p}}}{\ln_{\zeta}(K)^{\frac{1}{p-1}}} + cK^{1-\frac{1}{p}} T^{\frac{1}{p}} \ln_{\zeta}(K) \quad (\text{D.34})$$

$$\because \ln_{\zeta}(x \ln_{\zeta}(x)^{\frac{p}{p-1}}) \leq \ln_{\zeta} \left( x^{1+\frac{p}{p-1}} \right) \text{ for } x > 2 \quad (\text{D.35})$$

$$\leq O \left( K^{1-\frac{1}{p}} T^{\frac{1}{p}} \frac{\ln_{\zeta} \left( K^{\frac{2p-1}{p-1}} \right)^{\frac{p}{p-1}}}{\ln_{\zeta}(K)^{\frac{1}{p-1}}} \right). \quad (\text{D.36})$$

For the lower bound,

$$\lambda \frac{\left[ \ln \left( \frac{1}{1-\frac{1}{K}} \right) \right]^{-\zeta} - 1}{\zeta} \geq \lambda \frac{[K-1]^{\zeta} - 1}{\zeta} = \lambda \ln_{\zeta}(K-1).$$

187 Consequently, the lower bound is simply obtained by Theorem C.5. The corollary is proved.  $\square$

188 **Corollary D.3.** Suppose  $G$  follows a Gamma distribution with a parameter  $\alpha \geq 1$  and  $\lambda \geq 1$ . Then,  
189 the problem dependent regret bound is

$$\mathbb{E}[\mathcal{R}_T] \leq O \left( \sum_{a \neq a^*} \frac{C_{c,p,\nu_p,F}}{\Delta_a^{\frac{1}{p-1}}} + \left( \frac{(3\lambda\alpha c)^p}{\Delta_a} \right)^{\frac{1}{p-1}} \ln \left( \frac{\alpha T \Delta_a^{\frac{p}{p-1}}}{c^{\frac{p}{p-1}}} \right)^{\frac{p}{p-1}} + \Delta_a \right). \quad (\text{D.37})$$

190 The problem independent regret bound is

$$\Omega \left( \lambda K^{1-\frac{1}{p}} T^{\frac{1}{p}} \ln(K) \right) \leq \mathbb{E}[\mathcal{R}_T] \leq O \left( \left( \lambda \alpha \right)^{\frac{1}{p-1}} c K^{1-\frac{1}{p}} T^{\frac{1}{p}} \frac{\ln \left( \alpha K^{1+\frac{p}{p-1}} \right)^{\frac{p}{p-1}}}{\ln(K)^{\frac{1}{p-1}}} \right). \quad (\text{D.38})$$

191 The minimum rate is achieved at  $\alpha = 1$ ,  $\mathbb{E}[\mathcal{R}_T] = \Theta \left( K^{1-\frac{1}{p}} T^{\frac{1}{p}} \ln(K) \right)$ .

*Proof.* The CDF of a Gamma distribution is given as

$$F(x) = \frac{\gamma(x; \alpha, \lambda)}{\Gamma(\alpha)},$$

where  $\Gamma(\alpha)$  is a (complete) Gamma function and  $\gamma(x; \alpha, \lambda)$  is an incomplete Gamma function defined as

$$\gamma(x; \alpha, \lambda) := \int_0^x \frac{z^{\alpha-1} \exp\left(-\frac{z}{\lambda}\right)}{\lambda^{\alpha}} dz.$$

Before finding a lower and upper bound of  $F^{-1}$ , we introduce a lower and upper bound of a Gamma distribution. In [3], the bounds of  $F(x)$  is provided as follows, for  $\alpha > 1$

$$\left( 1 - \exp \left( -\frac{x}{\lambda \Gamma(1 + \alpha)^{\frac{1}{\alpha}}} \right) \right)^{\alpha} \leq F(x) \leq \left( 1 - \exp \left( -\frac{x}{\lambda} \right) \right)^{\alpha}.$$

From these bounds, we have,

$$\lambda \ln \left( \frac{1}{1 - y^{\frac{1}{\alpha}}} \right) \leq F^{-1}(y) \leq \lambda \Gamma(1 + \alpha)^{\frac{1}{\alpha}} \ln \left( \frac{1}{1 - y^{\frac{1}{\alpha}}} \right).$$

Note that the following inequality holds: for  $\alpha > 1$ ,

$$\Gamma(\alpha + 1) = \alpha(\alpha - 1) \cdots (\alpha - [\alpha] + 1) \Gamma(\alpha - [\alpha] + 1) \leq \alpha^{[\alpha]} \Gamma(1) \leq \alpha^\alpha.$$

We have a simpler upper bound as

$$F^{-1}(y) \leq \lambda \Gamma(1 + \alpha)^{\frac{1}{\alpha}} \ln \left( \frac{1}{1 - y^{\frac{1}{\alpha}}} \right) \leq \lambda \alpha \ln \left( \frac{\alpha}{1 - y} \right).$$

Then,

$$\left[ F^{-1} \left( 1 - \frac{1}{T} \left( \frac{c}{\Delta_a} \right)^{\frac{p}{p-1}} \right) \right]^{\frac{p}{p-1}} \leq \lambda^{\frac{p}{p-1}} \alpha^{\frac{p}{p-1}} \ln \left( \frac{\alpha T \Delta_a^{\frac{p}{p-1}}}{c^{\frac{p}{p-1}}} \right)^{\frac{p}{p-1}}.$$

192  $C$  can be obtained as,

$$\begin{aligned} \int_0^\infty \frac{h(z) \exp(-z)}{1 - F(z)} dz &= \int_0^\infty \frac{z^{\alpha-1} \exp(-\frac{z}{\lambda} - z)}{\lambda^\alpha \Gamma(\alpha) (1 - (1 - \exp(-\frac{z}{\lambda}))^\alpha)^2} dz \\ &\leq \int_0^\infty \frac{z^{\alpha-1} \exp(-\frac{z}{\lambda} - z)}{\lambda^\alpha \Gamma(\alpha) \exp(-2\frac{z}{\lambda})} dz \\ &= \int_0^\infty \frac{z^{\alpha-1} \exp(-z + \frac{z}{\lambda})}{\lambda^\alpha \Gamma(\alpha)} dz = \int_0^\infty \frac{t^{\alpha-1} \exp(-t)}{(\lambda - 1)^\alpha \Gamma(\alpha)} dt \\ &= \frac{1}{(\lambda - 1)^\alpha}. \end{aligned}$$

For  $\frac{(6c)^{\frac{p}{p-1}}}{\Delta_a^{\frac{1}{p-1}}} \left[ -F^{-1} \left( \frac{c^{\frac{p}{p-1}}}{T \Delta_a^{\frac{p}{p-1}}} \right) \right]_+^{\frac{p}{p-1}}$ , we have,

$$\frac{(6c)^{\frac{p}{p-1}}}{\Delta_a^{\frac{1}{p-1}}} \left[ -F^{-1} \left( \frac{c^{\frac{p}{p-1}}}{T \Delta_a^{\frac{p}{p-1}}} \right) \right]_+^{\frac{p}{p-1}} = 0.$$

193 since  $x \in (0, \infty)$ . Then, the problem dependent regret bound becomes,

$$\mathbb{E} [\mathcal{R}_T] \leq \sum_{a \neq a^*} \left[ \exp \left( \frac{b_p \nu_p}{2c^p} \right) \left\{ C + \frac{F(0)}{1 - F(0)} + 2^{\frac{2p-1}{p-1}} + 1 \right\} \Gamma \left( \frac{2p-1}{p-1} \right) \left( \frac{(3c)^p}{\Delta_a} \right)^{\frac{1}{p-1}} \right. \quad (\text{D.39})$$

$$\left. + \frac{(6c)^{\frac{p}{p-1}}}{\Delta_a^{\frac{1}{p-1}}} \left[ -F^{-1} \left( \frac{c^{\frac{p}{p-1}}}{T \Delta_a^{\frac{p}{p-1}}} \right) \right]_+^{\frac{p}{p-1}} + \left( \frac{(3c)^p}{\Delta_a} \right)^{\frac{1}{p-1}} \left[ F^{-1} \left( 1 - \frac{1}{T} \left( \frac{c}{\Delta_a} \right)^{\frac{p}{p-1}} \right) \right]_+^{\frac{p}{p-1}} \right] \quad (\text{D.40})$$

$$+ \left[ \left( \frac{c^p}{\Delta_a} \right)^{\frac{1}{p-1}} + \Delta_a \right] \quad (\text{D.41})$$

$$\leq \sum_{a \neq a^*} \left[ \exp \left( \frac{b_p \nu_p}{2c^p} \right) [(\lambda - 1)^{-\alpha} + 2^{\frac{2p-1}{p-1}} + 1] \Gamma \left( \frac{2p-1}{p-1} \right) \left( \frac{(3c)^p}{\Delta_a} \right)^{\frac{1}{p-1}} \right. \quad (\text{D.42})$$

$$\left. + \left( \frac{(3\lambda\alpha c)^p}{\Delta_a} \right)^{\frac{1}{p-1}} \ln \left( \frac{\alpha T \Delta_a^{\frac{p}{p-1}}}{c^{\frac{p}{p-1}}} \right)^{\frac{p}{p-1}} + \left( \frac{c^p}{\Delta_a} \right)^{\frac{1}{p-1}} + \Delta_a \right] \quad (\text{D.43})$$

$$\leq O \left( \sum_{a \neq a^*} \frac{C_{c,p,\nu_p,F}}{\Delta_a^{\frac{1}{p-1}}} + \left( \frac{(3\lambda\alpha c)^p}{\Delta_a} \right)^{\frac{1}{p-1}} \ln \left( \frac{\alpha T \Delta_a^{\frac{p}{p-1}}}{c^{\frac{p}{p-1}}} \right)^{\frac{p}{p-1}} + \Delta_a \right). \quad (\text{D.44})$$

194 The problem independent regret bound can be obtained by choosing the threshold of the minimum  
 195 gap as  $\Delta = c(K/T)^{1-\frac{1}{p}} \ln(K)$ .

$$\mathbb{E}[\mathcal{R}_T] \leq \sum_{\Delta_a > \Delta} \left[ \exp\left(\frac{b_p \nu_p}{2c^p}\right) [(\lambda-1)^{-\alpha} + 2^{\frac{2p-1}{p-1}} + 1] \Gamma\left(\frac{2p-1}{p-1}\right) \left(\frac{(3c)^p}{\Delta_a}\right)^{\frac{1}{p-1}} \right. \quad (\text{D.45})$$

$$\left. + \left(\frac{(3\lambda\alpha c)^p}{\Delta_a}\right)^{\frac{1}{p-1}} \ln\left(\frac{\alpha T \Delta_a^{\frac{p}{p-1}}}{c^{\frac{p}{p-1}}}\right)^{\frac{p}{p-1}} + \left(\frac{c^p}{\Delta_a}\right)^{\frac{1}{p-1}} \right] + \Delta T \quad (\text{D.46})$$

$$\leq K \left[ \exp\left(\frac{b_p \nu_p}{2c^p}\right) [(\lambda-1)^{-\alpha} + 2^{\frac{2p-1}{p-1}} + 1] \Gamma\left(\frac{2p-1}{p-1}\right) \left(\frac{(3c)^p}{\Delta}\right)^{\frac{1}{p-1}} \right. \quad (\text{D.47})$$

$$\left. + \left(\frac{(3\lambda\alpha c)^p}{\Delta}\right)^{\frac{1}{p-1}} \ln\left(\frac{\alpha T \Delta^{\frac{p}{p-1}}}{c^{\frac{p}{p-1}}}\right)^{\frac{p}{p-1}} + \left(\frac{c^p}{\Delta}\right)^{\frac{1}{p-1}} \right] + \Delta T \quad (\text{D.48})$$

$$\leq \exp\left(\frac{b_p \nu_p}{2c^p}\right) [(\lambda-1)^{-\alpha} + 2^{\frac{2p-1}{p-1}} + 1] \Gamma\left(\frac{2p-1}{p-1}\right) 3^{\frac{p}{p-1}} c K^{1-\frac{1}{p}} T^{\frac{1}{p}} \ln(K)^{-\frac{1}{p-1}} \quad (\text{D.49})$$

$$+ (3\lambda\alpha)^{\frac{1}{p-1}} c K^{1-\frac{1}{p}} T^{\frac{1}{p}} \frac{\ln\left(\alpha K \ln(K)^{\frac{p}{p-1}}\right)^{\frac{p}{p-1}}}{\ln(K)^{\frac{1}{p-1}}} \quad (\text{D.50})$$

$$+ c K^{1-\frac{1}{p}} T^{\frac{1}{p}} \ln(K)^{-\frac{1}{p-1}} + c K^{1-\frac{1}{p}} T^{\frac{1}{p}} \ln(K) \quad (\text{D.51})$$

$$\leq \exp\left(\frac{b_p \nu_p}{2c^p}\right) [(\lambda-1)^{-\alpha} + 2^{\frac{2p-1}{p-1}} + 1] \Gamma\left(\frac{2p-1}{p-1}\right) 3^{\frac{p}{p-1}} c K^{1-\frac{1}{p}} T^{\frac{1}{p}} \ln(K)^{-\frac{1}{p-1}} \quad (\text{D.52})$$

$$+ (3\lambda\alpha)^{\frac{1}{p-1}} c K^{1-\frac{1}{p}} T^{\frac{1}{p}} \frac{\ln\left(\alpha K^{1+\frac{p}{p-1}}\right)^{\frac{p}{p-1}}}{\ln(K)^{\frac{1}{p-1}}} \quad (\text{D.53})$$

$$+ c K^{1-\frac{1}{p}} T^{\frac{1}{p}} \ln(K)^{-\frac{1}{p-1}} + c K^{1-\frac{1}{p}} T^{\frac{1}{p}} \ln(K) \quad (\text{D.54})$$

$$\leq O\left(\left(\lambda\alpha\right)^{\frac{1}{p-1}} c K^{1-\frac{1}{p}} T^{\frac{1}{p}} \frac{\ln\left(\alpha K^{1+\frac{p}{p-1}}\right)^{\frac{p}{p-1}}}{\ln(K)^{\frac{1}{p-1}}}\right) \quad (\text{D.55})$$

For the lower bound, we use,

$$F^{-1}(y) \geq \lambda \ln\left(\frac{1}{1-y^{\frac{1}{\alpha}}}\right) \geq \lambda \ln\left(\frac{y}{1-y}\right).$$

Thus, the lower bound becomes

$$\Omega\left(\lambda K^{1-\frac{1}{p}} T^{\frac{1}{p}} \ln(K)\right).$$

196

□

197 **Corollary D.4.** Suppose  $G$  follows a Pareto distribution with a parameter  $\alpha > \frac{p^2}{p-1}$  and  $\lambda \geq \alpha$ .  
 198 Then, the problem dependent regret bound is

$$\mathbb{E}[\mathcal{R}_T] \leq O\left(\sum_{a \neq \alpha^*} \frac{C_{c,p,\nu_p,F}}{\Delta_a^{\frac{1}{p-1}}} + \left(\frac{(3\lambda c)^p}{\Delta_a}\right)^{\frac{1}{p-1}} \left[\frac{T \Delta_a^{\frac{p}{p-1}}}{c^{\frac{p}{p-1}}}\right]^{\frac{p}{\alpha(p-1)}} + \Delta_a\right). \quad (\text{D.56})$$

199 For  $\lambda = \alpha$ , the problem independent regret bound is

$$\Omega\left(\alpha K^{1-\frac{1}{p}+\frac{1}{\alpha}} T^{\frac{1}{p}}\right) \leq \mathbb{E}[\mathcal{R}_T] \leq O\left(\alpha^{1+\frac{p^2}{\alpha(p-1)^2}} K^{1-\frac{1}{p}+\frac{1}{\alpha(p-1)}} T^{\frac{1}{p}}\right). \quad (\text{D.57})$$

200 For  $K > \exp\left(\frac{p^2}{p-1}\right)$ , the minimum rate is achieved at  $\alpha = \ln(K)$ ,  $\mathbb{E}[\mathcal{R}_T] = \Theta\left(K^{1-\frac{1}{p}} T^{\frac{1}{p}} \ln(K)\right)$ .

*Proof.* The CDF of a Pareto distribution is given as

$$F(x) = 1 - \frac{1}{(x/\lambda)^\alpha}$$

Then, its inverse is

$$F^{-1}(y) = \lambda(1 - y)^{-\frac{1}{\alpha}},$$

Then,

$$\left[ F^{-1} \left( 1 - \frac{1}{T} \left( \frac{c}{\Delta_a} \right)^{\frac{p}{p-1}} \right) \right]^{\frac{p}{p-1}} = \lambda^{\frac{p}{p-1}} \left[ \frac{T \Delta_a^{\frac{p}{p-1}}}{c^{\frac{p}{p-1}}} \right]^{\frac{p}{\alpha(p-1)}}.$$

201  $C$  can be obtained as,

$$\begin{aligned} \int_0^\infty \frac{h(z) \exp(-z)}{1 - F(z)} dz &= \int_0^\infty \frac{\alpha \lambda^\alpha z^{-\alpha-1} \exp(-z)}{(z/\lambda)^{-2\alpha}} dz \\ &= \int_0^\infty \frac{\alpha z^{\alpha-1} \exp(-z)}{\lambda^\alpha} dz \\ &= \frac{\alpha \Gamma(\alpha)}{\lambda^\alpha} = \frac{\Gamma(\alpha + 1)}{\lambda^\alpha} \\ &\leq 1 \quad \because \lambda \geq \alpha. \end{aligned}$$

For  $\frac{(6c)^{\frac{p}{p-1}}}{\Delta_a^{\frac{1}{p-1}}} \left[ -F^{-1} \left( \frac{c^{\frac{p}{p-1}}}{T \Delta_a^{\frac{p}{p-1}}} \right) \right]_+$ , we have,

$$\frac{(6c)^{\frac{p}{p-1}}}{\Delta_a^{\frac{1}{p-1}}} \left[ -F^{-1} \left( \frac{c^{\frac{p}{p-1}}}{T \Delta_a^{\frac{p}{p-1}}} \right) \right]_+^{\frac{p}{p-1}} = 0$$

202 where  $-F^{-1}(y)$  is always negative since the support of  $x$  is  $(\lambda, \infty)$ . Then, the problem dependent  
203 regret bound becomes,

$$\mathbb{E}[\mathcal{R}_T] \leq \sum_{a \neq a^*} \left[ \exp\left(\frac{b_p \nu_p}{2c^p}\right) \left\{ C + \frac{F(0)}{1 - F(0)} + 2^{\frac{2p-1}{p-1}} + 1 \right\} \Gamma\left(\frac{2p-1}{p-1}\right) \left(\frac{(3c)^p}{\Delta_a}\right)^{\frac{1}{p-1}} \right. \quad (\text{D.58})$$

$$\left. + \frac{(6c)^{\frac{p}{p-1}}}{\Delta_a^{\frac{1}{p-1}}} \left[ -F^{-1} \left( \frac{c^{\frac{p}{p-1}}}{T \Delta_a^{\frac{p}{p-1}}} \right) \right]_+^{\frac{p}{p-1}} + \left(\frac{(3c)^p}{\Delta_a}\right)^{\frac{1}{p-1}} \left[ F^{-1} \left( 1 - \frac{1}{T} \left( \frac{c}{\Delta_a} \right)^{\frac{p}{p-1}} \right) \right]_+^{\frac{p}{p-1}} \right] \quad (\text{D.59})$$

$$+ \left[ \left(\frac{c^p}{\Delta_a}\right)^{\frac{1}{p-1}} + \Delta_a \right] \quad (\text{D.60})$$

$$\leq \sum_{a \neq a^*} \left[ \exp\left(\frac{b_p \nu_p}{2c^p}\right) \left[ 2^{\frac{2p-1}{p-1}} + 2 \right] \Gamma\left(\frac{2p-1}{p-1}\right) \left(\frac{(3c)^p}{\Delta_a}\right)^{\frac{1}{p-1}} \right. \quad (\text{D.61})$$

$$\left. + \left(\frac{(3\lambda c)^p}{\Delta_a}\right)^{\frac{1}{p-1}} \left[ \frac{T \Delta_a^{\frac{p}{p-1}}}{c^{\frac{p}{p-1}}} \right]^{\frac{p}{\alpha(p-1)}} + \left(\frac{c^p}{\Delta_a}\right)^{\frac{1}{p-1}} + \Delta_a \right] \quad (\text{D.62})$$

$$\leq O \left( \sum_{a \neq a^*} \frac{C_{c,p,\nu_p,F}}{\Delta_a^{\frac{1}{p-1}}} + \left(\frac{(3\lambda c)^p}{\Delta_a}\right)^{\frac{1}{p-1}} \left[ \frac{T \Delta_a^{\frac{p}{p-1}}}{c^{\frac{p}{p-1}}} \right]^{\frac{p}{\alpha(p-1)}} + \Delta_a \right). \quad (\text{D.63})$$

204 The problem independent regret bound can be obtained by choosing the threshold of the minimum  
205 gap as  $\Delta = c(K/T)^{1-\frac{1}{p}} \alpha$ .

$$\mathbb{E}[\mathcal{R}_T] \leq \sum_{\Delta_a > \Delta} \left[ \exp\left(\frac{b_p \nu_p}{2c^p}\right) \left[ 2^{\frac{2p-1}{p-1}} + 2 \right] \Gamma\left(\frac{2p-1}{p-1}\right) \left(\frac{(3c)^p}{\Delta_a}\right)^{\frac{1}{p-1}} \right. \quad (\text{D.64})$$

$$+ \left( \frac{(3\lambda c)^p}{\Delta_a} \right)^{\frac{1}{p-1}} \left[ \frac{T\Delta_a^{\frac{p}{p-1}}}{c^{\frac{p}{p-1}}} \right]^{\frac{p}{\alpha(p-1)}} + \left( \frac{c^p}{\Delta_a} \right)^{\frac{1}{p-1}} \Big] + \Delta T \quad (\text{D.65})$$

$$\leq K \left[ \exp \left( \frac{b_p \nu_p}{2c^p} \right) \left[ 2^{\frac{2p-1}{p-1}} + 2 \right] \Gamma \left( \frac{2p-1}{p-1} \right) \left( \frac{(3c)^p}{\Delta} \right)^{\frac{1}{p-1}} \right. \quad (\text{D.66})$$

$$\left. + \left( \frac{(3\lambda c)^p}{\Delta} \right)^{\frac{1}{p-1}} \left[ \frac{T\Delta^{\frac{p}{p-1}}}{c^{\frac{p}{p-1}}} \right]^{\frac{p}{\alpha(p-1)}} + \left( \frac{c^p}{\Delta} \right)^{\frac{1}{p-1}} \right] + \Delta T \quad (\text{D.67})$$

$$\because x^{\frac{p^2}{\alpha(p-1)^2} - \frac{1}{p-1}} \text{ is decreasing for } \alpha > \frac{p^2}{p-1} \quad (\text{D.68})$$

$$\leq \exp \left( \frac{b_p \nu_p}{2c^p} \right) \left[ 2^{\frac{2p-1}{p-1}} + 2 \right] \Gamma \left( \frac{2p-1}{p-1} \right) 3^{\frac{p}{p-1}} c K^{1-\frac{1}{p}} T^{\frac{1}{p}} \alpha^{-\frac{1}{p-1}} \quad (\text{D.69})$$

$$+ (3\lambda)^{\frac{p}{p-1}} c K^{1-\frac{1}{p} + \frac{p^2}{\alpha(p-1)^2}} T^{\frac{1}{p}} \alpha^{\frac{p^2}{\alpha(p-1)^2} - \frac{1}{p-1}} + c \alpha^{\frac{1}{p-1}} K^{1-\frac{1}{p}} T^{\frac{1}{p}} + c \alpha K^{1-\frac{1}{p}} T^{\frac{1}{p}} \quad (\text{D.70})$$

$$\leq \exp \left( \frac{b_p \nu_p}{2c^p} \right) \left[ 2^{\frac{2p-1}{p-1}} + 2 \right] \Gamma \left( \frac{2p-1}{p-1} \right) 3^{\frac{p}{p-1}} c K^{1-\frac{1}{p}} T^{\frac{1}{p}} \alpha^{-\frac{1}{p-1}} \quad (\text{D.71})$$

$$+ 3^{\frac{p}{p-1}} c K^{1-\frac{1}{p} + \frac{p^2}{\alpha(p-1)^2}} T^{\frac{1}{p}} \alpha^{1 + \frac{p^2}{\alpha(p-1)^2}} + c \alpha^{\frac{1}{p-1}} K^{1-\frac{1}{p}} T^{\frac{1}{p}} + c \alpha K^{1-\frac{1}{p}} T^{\frac{1}{p}} \quad (\text{D.72})$$

$$\because \lambda = \alpha \quad (\text{D.73})$$

$$\leq O \left( c \alpha^{1 + \frac{p^2}{\alpha(p-1)^2}} K^{1-\frac{1}{p} + \frac{2p}{\alpha(p-1)}} T^{\frac{1}{p}} \right). \quad (\text{D.74})$$

For the minimum rate, we set  $\alpha = \ln(K)$ , then,

$$O \left( \ln(K)^{1 + \frac{p^2}{\ln(K)(p-1)^2}} K^{1-\frac{1}{p} + \frac{2p}{\ln(K)(p-1)}} T^{\frac{1}{p}} \right) \leq O \left( K^{1-\frac{1}{p}} T^{\frac{1}{p}} \ln(K) \right)$$

where  $\ln(K)^{1 + \frac{p^2}{\ln(K)(p-1)^2}} \leq e^{\frac{p^2}{e(p-1)^2}} \ln(K)$ . For the lower bound,

$$\Omega \left( K^{1-\frac{1}{p}} T^{\frac{1}{p}} F^{-1} \left( 1 - \frac{1}{K} \right) \right) = \Omega \left( \lambda K^{1-\frac{1}{p} + \frac{1}{\alpha}} T^{\frac{1}{p}} \right) \geq \Omega \left( \alpha K^{1-\frac{1}{p} + \frac{1}{\alpha}} T^{\frac{1}{p}} \right)$$

206 The corollary is proved.  $\square$

207 **Corollary D.5.** Suppose  $G$  follows a Fréchet distribution with a parameter with  $\alpha > \frac{p^2}{p-1}$  and  $\lambda \geq \alpha$ .

208 Then, the problem dependent regret bound is

$$\mathbb{E}[\mathcal{R}_T] \leq O \left( \sum_{a \neq \alpha^*} \frac{C_{c,p,\nu_p,F}}{\Delta_a^{\frac{1}{p-1}}} + \left( \frac{(3c\lambda)^p}{\Delta_a} \right)^{\frac{1}{p-1}} \left[ \frac{T\Delta_a^{\frac{p}{p-1}}}{c^{\frac{p}{p-1}}} \right]^{\frac{p}{\alpha(p-1)}} + \Delta_a \right). \quad (\text{D.75})$$

209 For  $\lambda = \alpha$ , the problem independent regret bound is

$$\Omega \left( \alpha K^{1-\frac{1}{p} + \frac{1}{\alpha}} T^{\frac{1}{p}} \right) \leq \mathbb{E}[\mathcal{R}_T] \leq O \left( \alpha^{1 + \frac{p^2}{\alpha(p-1)^2}} K^{1-\frac{1}{p} + \frac{p^2}{\alpha(p-1)^2}} T^{\frac{1}{p}} \right). \quad (\text{D.76})$$

210 For  $K > \exp \left( \frac{p^2}{p-1} \right)$ , the minimum rate is achieved at  $\alpha = \ln(K)$ ,  $\mathbb{E}[\mathcal{R}_T] = \Theta \left( K^{1-\frac{1}{p}} T^{\frac{1}{p}} \ln(K) \right)$ .

*Proof.* The CDF of a Fréchet distribution is given as

$$F(x) = \exp \left( - \left( \frac{x}{\lambda} \right)^{-\alpha} \right)$$

Then, its inverse is

$$F^{-1}(y) = \lambda \ln(1/y)^{-1/\alpha} \leq (1-y)^{-1/\alpha}$$



and

$$\lambda \ln(1/y)^{-1/\alpha} \geq \lambda \left( \frac{y}{1-y} \right)^{\frac{1}{\alpha}}$$

where  $\ln(x) \leq x - 1$  is used. Then,

$$\left[ F^{-1} \left( 1 - \frac{c^2}{T\Delta_a^2} \right) \right]^2 \leq \lambda^2 \left[ \frac{T\Delta_a^2}{c^2} \right]^{2/\alpha}.$$

211 In [1], we have  $\sup h \leq 2\frac{\alpha}{\lambda} \leq 2$  due to  $\lambda \geq \alpha$ , and  $M$  can be obtained,

$$\begin{aligned} \int_0^\infty \frac{\exp(-z)}{\left(1 - \exp\left(-\left(\frac{z}{\lambda}\right)^{-\alpha}\right)\right)} dz &\leq \int_0^\infty \left(1 + \left(\frac{z}{\lambda}\right)^\alpha\right) \exp(-z) dz \\ &\quad \because 1/(1 - \exp(-x^{-1})) \leq 1 + x \\ &= 1 + \int_0^\infty \left(\frac{z}{\lambda}\right)^\alpha \exp(-z) dz \\ &= 1 + \frac{\Gamma(\alpha + 1)}{\lambda^\alpha} \\ &\leq 1 + \frac{\Gamma(\alpha + 1)}{\lambda^\alpha} \leq 2. \end{aligned}$$

Thus,

$$(\sup h)M \leq 4.$$

For  $\frac{(6c)^{\frac{p}{p-1}}}{\Delta_a^{\frac{1}{p-1}}} \left[ -F^{-1} \left( \frac{c^{\frac{p}{p-1}}}{T\Delta_a^{\frac{p}{p-1}}} \right) \right]_{+}^{\frac{p}{p-1}}$ , the summation is zero,

$$\frac{(6c)^{\frac{p}{p-1}}}{\Delta_a^{\frac{1}{p-1}}} \left[ -F^{-1} \left( \frac{c^{\frac{p}{p-1}}}{T\Delta_a^{\frac{p}{p-1}}} \right) \right]_{+}^{\frac{p}{p-1}} = 0,$$

212 since its support is  $(0, \infty)$ . Then, the problem dependent regret bound becomes,

$$\mathbb{E}[\mathcal{R}_T] \leq \sum_{a \neq a^*} \left[ \exp\left(\frac{b_p \nu_p}{2c^p}\right) \left\{ \|h\|_\infty M_1 + \frac{F(0)}{1 - F(0)} + 2^{\frac{2p-1}{p-1}} + 1 \right\} \Gamma\left(\frac{2p-1}{p-1}\right) \left(\frac{(3c)^p}{\Delta_a}\right)^{\frac{1}{p-1}} \right] \quad (\text{D.77})$$

$$+ \frac{(6c)^{\frac{p}{p-1}}}{\Delta_a^{\frac{1}{p-1}}} \left[ -F^{-1} \left( \frac{c^{\frac{p}{p-1}}}{T\Delta_a^{\frac{p}{p-1}}} \right) \right]_{+}^{\frac{p}{p-1}} \quad (\text{D.78})$$

$$+ \left(\frac{(3c)^p}{\Delta_a}\right)^{\frac{1}{p-1}} \left\{ F^{-1} \left( 1 - \frac{1}{T} \left(\frac{c}{\Delta_a}\right)^{\frac{p}{p-1}} \right) \right\}^{\frac{p}{p-1}} \quad (\text{D.79})$$

$$+ \left(\frac{c^p}{\Delta_a}\right)^{\frac{1}{p-1}} + \Delta_a \quad (\text{D.80})$$

$$\leq \sum_{a \neq a^*} \left[ \exp\left(\frac{b_p \nu_p}{2c^p}\right) \left\{ 4 + 2^{\frac{2p-1}{p-1}} + 1 \right\} \Gamma\left(\frac{2p-1}{p-1}\right) \left(\frac{(3c)^p}{\Delta_a}\right)^{\frac{1}{p-1}} \right] \quad (\text{D.81})$$

$$+ \left(\frac{(3c\lambda)^p}{\Delta_a}\right)^{\frac{1}{p-1}} \left[ \frac{T\Delta_a^{\frac{p}{p-1}}}{c^{\frac{p}{p-1}}} \right]^{\frac{p}{\alpha(p-1)}} + \left(\frac{c^p}{\Delta_a}\right)^{\frac{1}{p-1}} + \Delta_a \quad (\text{D.82})$$

$$\leq O \left( \sum_{a \neq a^*} \frac{C_{c,p,\nu_p,F}}{\Delta_a^{\frac{1}{p-1}}} + \left(\frac{(3c\lambda)^p}{\Delta_a}\right)^{\frac{1}{p-1}} \left[ \frac{T\Delta_a^{\frac{p}{p-1}}}{c^{\frac{p}{p-1}}} \right]^{\frac{p}{\alpha(p-1)}} + \Delta_a \right). \quad (\text{D.83})$$

213 The problem independent regret bound can be obtained by choosing the threshold of the minimum  
 214 gap as  $\Delta = c(K/T)^{1-\frac{1}{p}} \alpha$ .

$$\mathbb{E}[\mathcal{R}_T] \leq \sum_{\Delta_a > \Delta} \left[ \exp\left(\frac{b_p \nu_p}{2c^p}\right) \left[5 + 2^{\frac{2p-1}{p-1}}\right] \Gamma\left(\frac{2p-1}{p-1}\right) \left(\frac{(3c)^p}{\Delta_a}\right)^{\frac{1}{p-1}} \right. \quad (\text{D.84})$$

$$\left. + \left(\frac{(3c\lambda)^p}{\Delta_a}\right)^{\frac{1}{p-1}} \left[\frac{T\Delta_a^{\frac{p}{p-1}}}{c^{\frac{p}{p-1}}}\right]^{\frac{1}{\alpha(p-1)}} + \left(\frac{c^p}{\Delta_a}\right)^{\frac{1}{p-1}} \right] + \Delta T \quad (\text{D.85})$$

$$\leq K \left[ \exp\left(\frac{b_p \nu_p}{2c^p}\right) \left[5 + 2^{\frac{2p-1}{p-1}}\right] \Gamma\left(\frac{2p-1}{p-1}\right) \left(\frac{(3c)^p}{\Delta}\right)^{\frac{1}{p-1}} \right. \quad (\text{D.86})$$

$$\left. + \left(\frac{(3c\lambda)^p}{\Delta}\right)^{\frac{1}{p-1}} \left[\frac{T\Delta^{\frac{p}{p-1}}}{c^{\frac{p}{p-1}}}\right]^{\frac{1}{\alpha(p-1)}} + \left(\frac{c^p}{\Delta}\right)^{\frac{1}{p-1}} \right] + \Delta T \quad (\text{D.87})$$

$$\leq \exp\left(\frac{b_p \nu_p}{2c^p}\right) \left[5 + 2^{\frac{2p-1}{p-1}}\right] \Gamma\left(\frac{2p-1}{p-1}\right) 3^{\frac{p}{p-1}} c K^{1-\frac{1}{p}} T^{\frac{1}{p}} \alpha^{-\frac{1}{p-1}} \quad (\text{D.88})$$

$$+ 3^{\frac{p}{p-1}} c \lambda^{\frac{p}{p-1}} K^{1-\frac{1}{p} + \frac{p^2}{\alpha(p-1)^2}} T^{\frac{1}{p}} \alpha^{\frac{p^2}{\alpha(p-1)^2} - \frac{1}{p-1}} + c \alpha^{\frac{1}{p-1}} K^{1-\frac{1}{p}} T^{\frac{1}{p}} + c \alpha K^{1-\frac{1}{p}} T^{\frac{1}{p}} \quad (\text{D.89})$$

$$\leq \exp\left(\frac{b_p \nu_p}{2c^p}\right) \left[5 + 2^{\frac{2p-1}{p-1}}\right] \Gamma\left(\frac{2p-1}{p-1}\right) 3^{\frac{p}{p-1}} c K^{1-\frac{1}{p}} T^{\frac{1}{p}} \alpha^{-\frac{1}{p-1}} \quad (\text{D.90})$$

$$+ 3^{\frac{p}{p-1}} c K^{1-\frac{1}{p} + \frac{p^2}{\alpha(p-1)^2}} T^{\frac{1}{p}} \alpha^{1 + \frac{p^2}{\alpha(p-1)^2} - \frac{1}{p-1}} + c \alpha^{\frac{1}{p-1}} K^{1-\frac{1}{p}} T^{\frac{1}{p}} + c \alpha K^{1-\frac{1}{p}} T^{\frac{1}{p}} \quad (\text{D.91})$$

$$\leq O\left(\alpha^{1 + \frac{p^2}{\alpha(p-1)^2}} K^{1-\frac{1}{p} + \frac{p^2}{\alpha(p-1)^2}} T^{\frac{1}{p}}\right). \quad (\text{D.92})$$

The optimal rate is obtained by setting  $\alpha = \ln(K)$ ,

$$O\left(\ln(K)^{1 + \frac{p^2}{\ln(K)(p-1)^2}} K^{1-\frac{1}{p} + \frac{p^2}{\ln(K)(p-1)^2}} T^{\frac{1}{p}}\right) \leq O\left(K^{1-\frac{1}{p}} T^{\frac{1}{p}} \ln(K)\right),$$

where  $\ln(K)^{\frac{p^2}{\ln(K)(p-1)^2}} \leq e^{\frac{p^2}{\ln(K)(p-1)^2}}$ . Before proving the lower bound, note that

$$F^{-1}\left(1 - \frac{1}{K}\right) = \lambda \ln\left(\frac{1}{1 - \frac{1}{K}}\right)^{-1/\alpha} \geq \alpha (K-1)^{1/\alpha}$$

215 Consequently, the lower bound is simply obtained by Theorem C.5. The corollary is proved.  $\square$

## 216 E Experimental Settings

**Convergence of Estimator** We compare the  $p$ -robust estimator with other estimators including truncated mean, median of mean, and sample mean. To make a heavy-tailed noise, we employ a Pareto distribution as follows,

$$z_t \sim \text{Pareto}(\alpha_\epsilon, \lambda_\epsilon)$$

217 where  $\alpha_\epsilon$  is a shape parameter and  $\lambda_\epsilon$  is a scale parameter. Then, a noise is defined as  $\epsilon_t := z_t - \mathbb{E}[z_t]$   
 218 to make the mean of the noise zero. In simulation, we set a true mean  $y = 1$  and  $Y_t = y + \epsilon_t$  is  
 219 observed. The  $p$ -th moment of  $Y_t$  is computed as follows,

$$\mathbb{E}|Y_t|^p = \mathbb{E}|y + z_t - \mathbb{E}[z_t]|^p \leq \left(|y - \mathbb{E}[z_t]| + (\mathbb{E}|z_t|^p)^{1/p}\right)^p \quad (\text{E.1})$$

where the triangular inequality is used. Since  $z_t$  is a Pareto random variable with  $\alpha_\epsilon$  and  $\lambda_\epsilon$ , we have, for  $\alpha_\epsilon > p$ ,

$$\mathbb{E}[z_t] = \frac{\alpha_\epsilon \lambda_\epsilon}{\alpha_\epsilon - 1}$$

and

$$\mathbb{E}|z_t|^p = \frac{\alpha_\epsilon \lambda_\epsilon^p}{\alpha_\epsilon - p}.$$

Hence, the upper bound of the  $p$ -th moment is given as

$$\nu_p := \left( \left| 1 - \frac{\alpha_\epsilon \lambda_\epsilon}{\alpha_\epsilon - 1} \right| + \frac{\alpha_\epsilon^{1/p} \lambda_\epsilon}{(\alpha_\epsilon - p)^{1/p}} \right)^p.$$

220 While the proposed method does not require  $\nu_p$ , truncated mean or median of mean estimator requires  
221  $\nu_p$ .

**Multi-Armed Bandits with Heavy-Tailed Rewards** Entire experimental results are shown in Figure E.1. For robust UCB [4], we modify the confidence bound as

$$c\nu_p^{1/p} \left( \frac{\eta \ln(1/\delta)}{n} \right)^{1-1/p},$$

222 where  $c > 0$ . Since the original confidence bound makes convergence slow, we scale down the  
223 confidence bound. This modification shows much better performance than the original robust UCB  
224 and we optimize  $c$  by using the grid search over  $[0.001, 5.0]$ . We make the grid by dividing  $[0.1, 5.0]$   
225 into 50 parts,  $[0.01, 0.1]$  into 10 parts. Furthermore, 0.005 and 0.001 are also tested. Total 62 trials are  
226 conducted for the grid search and the best parameter is selected. For the proposed method and DSEE  
227 [7], the best parameter is chosen by the same way. Unlikely to other methods, the hyperparameter  
228  $q$  of GSR [5] is within  $[0.0, 1.0]$ . Thus, we make the grid by dividing  $[0.02, 1.0]$  into 50 parts,  
229  $(0.002, 0.02]$  into 10 parts and finally, 0.005 and 0.0001 are searched. Total 62 trials are conducted  
230 for the grid search and the best parameter is selected.

231 From a practical perspective, reducing the number of tuning parameters makes the algorithm more  
232 robust. In particular, the perturbations do not depend on both bound and moment. So, the exploration  
233 tendency is not much sensitive to the mismatch of the moment parameter. To verify this, we add  
234 simple simulations by mismatching the moment parameter where all other settings are the same as  
235 the experiments in the manuscript. As shown in the above  $\mathcal{R}_t/t$  plot in Figure E.2, (a) APE<sup>2</sup> with  
236 Frechet perturbation shows a robust performance while (b) the robust UCB is sensitive depending on  
237 the choice of  $q$ , the moment parameter for the algorithm (here  $p = 1.5$  is the true moment).

## 238 References

- 239 [1] Jacob D. Abernethy, Chansoo Lee, and Ambuj Tewari. Fighting bandits with a new kind of  
240 smoothness. In *Advances in Neural Information Processing Systems (NeurIPS)*, December 2015.
- 241 [2] Shipra Agrawal and Navin Goyal. Further optimal regret bounds for thompson sampling. In  
242 *Proc. of the 16th International Conference on Artificial Intelligence and Statistics (AISTATS)*,  
243 April 2013.
- 244 [3] Horst Alzer. On some inequalities for the incomplete gamma function. *Math. Comput.*, 66(218):  
245 771–778, 1997.
- 246 [4] Sébastien Bubeck, Nicolo Cesa-Bianchi, and Gábor Lugosi. Bandits with heavy tail. *IEEE*  
247 *Transactions on Information Theory*, 59(11):7711–7717, 2013.
- 248 [5] Anmol Kagrecha, Jayakrishnan Nair, and Krishna P. Jagannathan. Distribution oblivious, risk-  
249 aware algorithms for multi-armed bandits with unbounded rewards. In *Advances in Neural*  
250 *Information Processing Systems (NeurIPS)*, December 2019.
- 251 [6] Baekjin Kim and Ambuj Tewari. On the optimality of perturbations in stochastic and adversarial  
252 multi-armed bandit problems. In *Advances in Neural Information Processing Systems (NeurIPS)*,  
253 December 2019.
- 254 [7] Sattar Vakili, Keqin Liu, and Qing Zhao. Deterministic sequencing of exploration and exploitation  
255 for multi-armed bandit problems. *IEEE Journal of Selected Topics in Signal Processing*, 7(5):  
256 759–767, 2013.

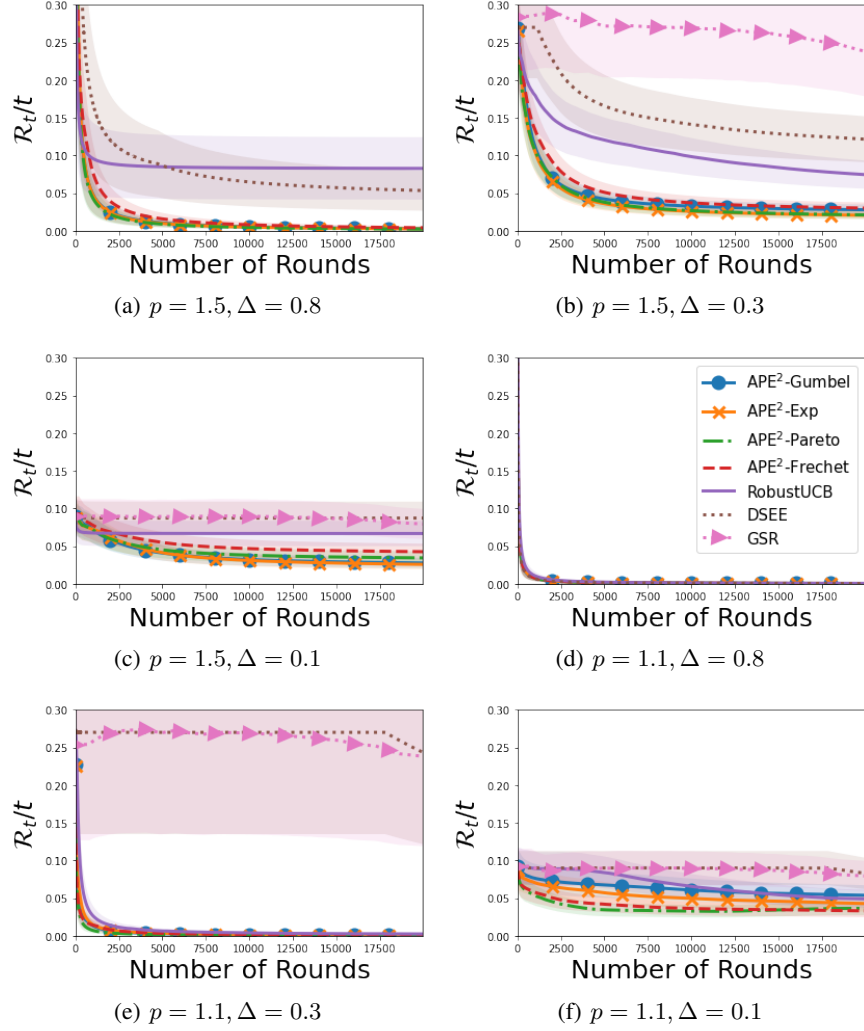

Figure E.1: Time-Averaged Cumulative Regret.  $p$  is the maximum order of the bounded moment of noises.  $\Delta$  is the gap between the maximum and second best reward. For  $p = 1.5$ ,  $\lambda_\epsilon = 1.0$  and for  $p = 1.1$ ,  $\lambda_\epsilon = 0.1$ . The solid line is an averaged error over 40 runs and a shaded region shows a quarter standard deviation.

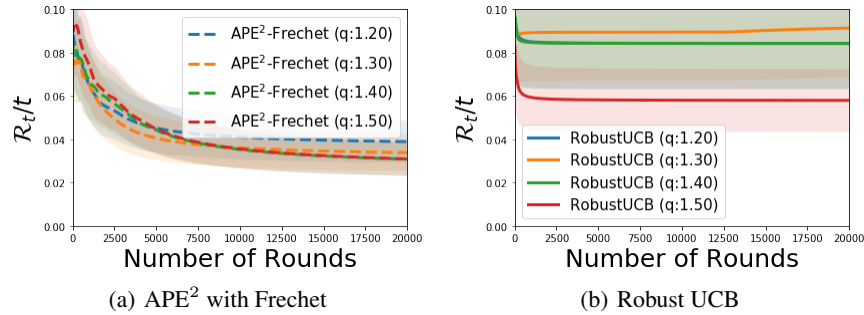

Figure E.2:  $\mathcal{R}_t/t$  plot with  $p = 1.5, \Delta = 0.1$ . (a) APE<sup>2</sup> with Frechet perturbation shows a robust performance while (b) the robust UCB is sensitive depending on the choice of  $q$ , the moment parameter for the algorithm. Other perturbations show similar tendency.
